# Supplementary material for: Fine-tune control of targeted RNAi efficacy by plant artificial small RNAs
Source: PubMed Central journal article supplement (PMC7293048; doi:10.1093/nar/gkaa343), 2020-05-12
Supplement: gkaa343_supplemental_file.pdf [file gkaa343_supplemental_file.pdf]

## A Design of syn-tasiRNA overlapping oligonucleotides

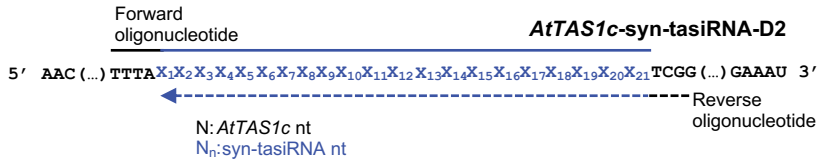

## B syn-tasiRNA cloning in *AtTAS1c-D2-B/c* vectors

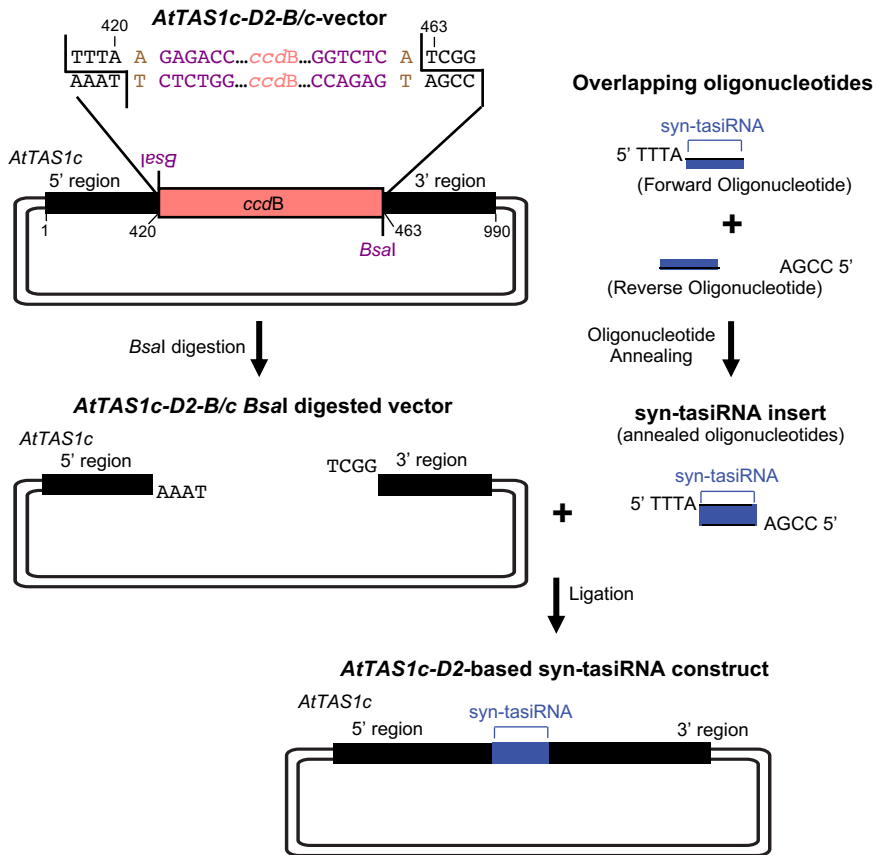

**Supplementary Figure S1.** Direct syn-tasiRNA cloning in *AtTAS1c-D2-B/c*-based vectors including a modified version of *AtTAS1c* with a *ccdB* cassette flanked by two *Bsal* sites (*Bsal/ccdB* or “B/c” vectors).

(A) Design of two overlapping oligonucleotides for syn-tasiRNA cloning. Sequence covered by the forward and reverse oligonucleotides are represented with continuous or dotted lines, respectively.

(B) Diagram of the steps for syn-tasiRNA cloning in *AtTAS1c-D2-B/c* vectors. The syn-tasiRNA insert obtained after annealing the two overlapping oligonucleotides has 5' TTTA and 5'-CCGA overhangs and is directly inserted into the *Bsal*-linearized *AtTAS1c-D2-B/c* vector. Nucleotides of the *Bsal* sites and arbitrary nucleotides used as spacers between the *Bsal* recognition site and the *AtTAS1c* sequence are in purple and light brown, respectively. Other details are as in Panel A.

**Syn-tasiRNA accumulation  
in transgenic Arabidopsis**

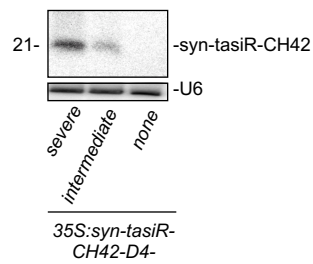

**Supplementary Figure S2.** Northern blot detection of syn-tasiR-CH42 in Arabidopsis T1 *35S:syn-tasiR-CH42-D4* transgenic lines. Each sample corresponds to a pool of at least 3 independent lines showing either severe, intermediate or no phenotype. The U6 RNA blot is shown as a loading control.

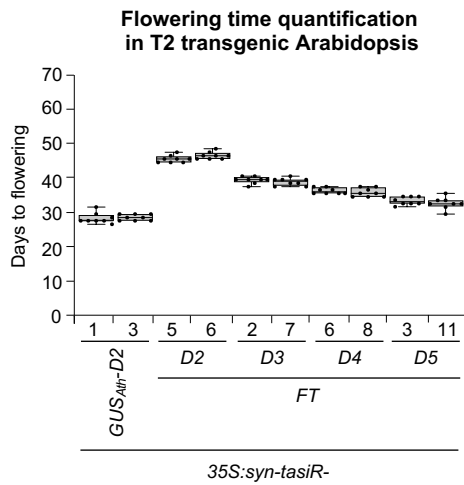

**Supplementary Figure S3.** Jitter box plot representing the mean flowering time (days to flowering) of Arabidopsis T2 transgenic lines expressing syn-tasiRNA constructs. Selected T2 lines originated from representative T1 lines with a flowering time similar to the mean of the corresponding group.

**Flowering time quantification in T2 transgenic Arabidopsis**

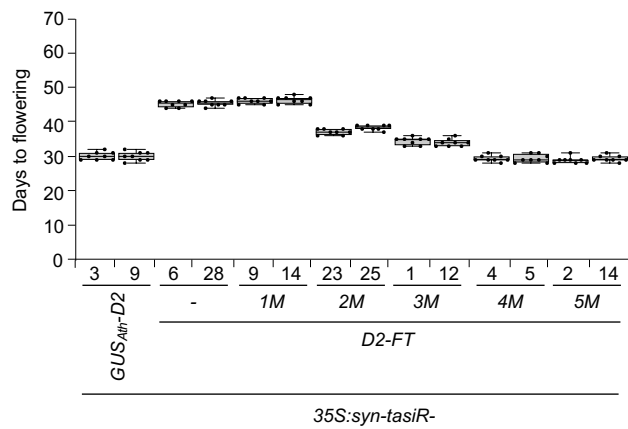

**Supplementary Figure S4.** Jitter box plot representing the mean flowering time (days to flowering) of Arabidopsis T2 transgenic lines expressing syn-tasiRNA constructs. Selected T2 lines originated from representative T1 lines with a flowering time similar to the mean of the corresponding group.

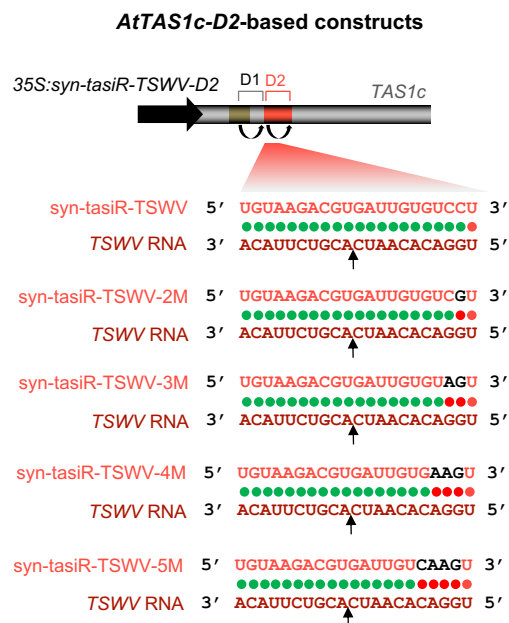

**Supplementary Figure S5.** Diagram of the syn-tasiRNA constructs. Base-pairing and mismatches between syn-tasiRNA and target RNA nucleotides are shown with green and red circles, respectively. Mutated nucleotides are shown in black. Other details are as in Figures 1A and 3A.

*AtMIR173*

Modified *AtMIR173*  
(A66U, U124A)

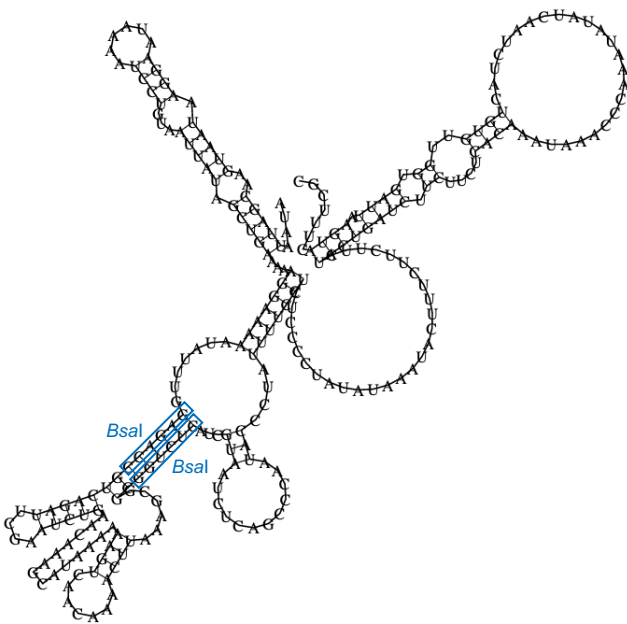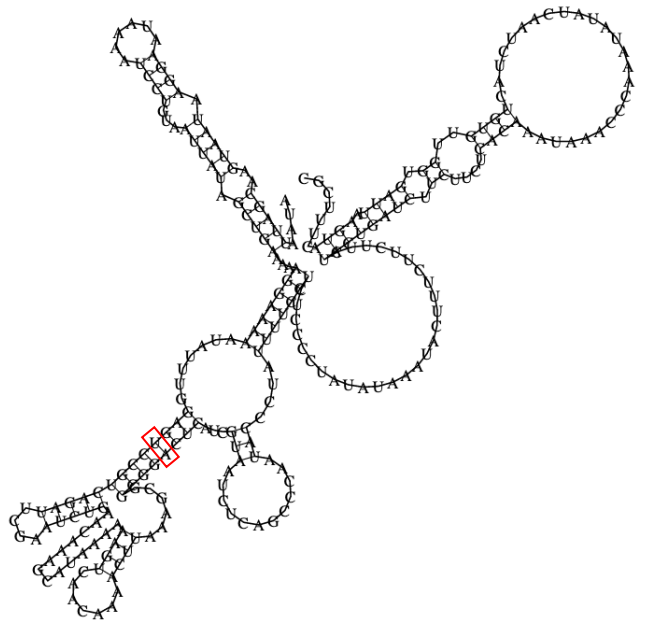

**Supplementary Figure S6.** M-fold predicted secondary structures of wild-type and modified *AtMIR173* precursors. Functional and disrupted *BsaI* sites are highlighted in blue and red, respectively.

## Supplementary Protocol S1

Protocol to design and clone syn-tasiRNAs downstream the 3'D1[+] position in *AtTAS1c-D2-BsaI/ccdB*-based ('B/c') vectors containing *AtTAS1c* precursor.

### 1. Selection of the syn-tasiRNA sequence(s)

Use the Syn-tasiRNA Designer app from the P-SAMS webtool at <http://p-sams.carringtonlab.org/syntasi/designer>.

### 2. Design of syn-tasiRNA oligonucleotides

Use the Syn-tasiRNA Designer app from the P-SAMS webtool at <http://p-sams.carringtonlab.org/syntasi/designer>.

#### 2.2.1 Sequence of the *AtTAS1c* cassette containing the syntasiRNA(s)

The following FASTA sequence includes two syn-tasiRNA sequences inserted in the *AtTAS1c* precursor sequence downstream position 3'D1[+]:

##### >syn-tasiRNA-1 and syn-tasiRNA-2 in *AtTAS1c*

```
AAACCTAAACCTAAACGGCTAAGCCCGACGTCAAATACCAAAAAGAGAAAAACAAGAGCGCCGT
CAAGCTCTGCAAATACGATCTGTAAGTCCATCTTAACACAAAAGTGAGATGGGTCTTAGATCA
TGTTCCGCCGTTAGATCGAGTCATGGTCTTGTCTCATAGAAAGGTACTTTTCGTTTACTTCTTTT
GAGTATCGAGTAGAGCGTCGTCTATAGTTAGTTTGAGATTGCGTTTGTGAGAAGTTAGGTTCAA
TGTTCCCGTCCAATTTTACCAGCCATGTGTCAGTTTCGTTCCCTCCCGTCCTCTTCTTTGATT
TCGTTGGGTACGGATGTTTTTCGAGATGAAACAGCATTGTTTTGTTGTGATTTTTCTCTACAAG
CGAATAGACCATTTAX1X2X3X4X5X6X7X8X9X10X11X12X13X14X15X16X17X18X19X20X21X1X2X3X4
X5X6X7X8X9X10X11X12X13X14X15X16X17X18X19X20X21TCGGTGGATCTTAGAAAATTATCTAAG
TCCAACATAGCGTATTCTAAGTTCAACATATCGACGAAGTAAAGACATTGGACATATTCCA
GGATATGCAAAAAGAAAACAATGAATATTGTTTTGAATGTGTTCAAGTAAATGAGATTTTCAAGT
CGTCTAAAGAACAGTTGCTAATACAGTTACTTATTTCAATAAATAATTGGTTCTAATAATACAA
AACATATTCGAGGATATGCAGAAAAAAGATGTTTTGTTATTTTTGAAAAGCTTGAGTAGTTTCTC
TCCGAGGTGTAGCGAAGAAGCATCATCTACTTTGTAATGTAATTTTCTTTATGTTTTCACTTG
TAATTTTATTTGTGTTAATGTACCATGGCCGATATCGGTTTTATTGAAAGAAAATTTATGTTAC
```

TTCTGTTTTGGCTTTGCAATCAGTTATGCTAGTTTTCTTATACCCTTTCGTAAGCTTCCTAAGG  
AATCGTTCATTGATTTCCACTGCTTCATTGTATATTTAAAACCTTACAACTGTATCGACCATCAT  
ATAATTCTGGGTCAAGAGATGAAAATAGAACCACCATCGTAAAGTCAAAT

Where:

- X** is a DNA base of the syn-tasiRNA-1 sequence, and the subscript number is the base position in the syn-tasiRNA-1 21-mer
- X** is a DNA base of the syn-tasiRNA-2 sequence, and the subscript number is the base position in the syn-tasiRNA-2 21-mer
- X** is a DNA base of the *AtTAS1c* precursor included in the oligonucleotides required to clone the syn-tasiRNA insert in B/c vectors
- X** is a DNA base of the *AtTAS1c* precursor

Note that in general, **X<sub>1</sub>=T** and **X<sub>1</sub>=T** for syn-tasiRNA association with AGO1.

In the sequence above, replace the sequences

**X<sub>1</sub>X<sub>2</sub>X<sub>3</sub>X<sub>4</sub>X<sub>5</sub>X<sub>6</sub>X<sub>7</sub>X<sub>8</sub>X<sub>9</sub>X<sub>10</sub>X<sub>11</sub>X<sub>12</sub>X<sub>13</sub>X<sub>14</sub>X<sub>15</sub>X<sub>16</sub>X<sub>17</sub>X<sub>18</sub>X<sub>19</sub>X<sub>20</sub>X<sub>21</sub>** and

**X<sub>1</sub>X<sub>2</sub>X<sub>3</sub>X<sub>4</sub>X<sub>5</sub>X<sub>6</sub>X<sub>7</sub>X<sub>8</sub>X<sub>9</sub>X<sub>10</sub>X<sub>11</sub>X<sub>12</sub>X<sub>13</sub>X<sub>14</sub>X<sub>15</sub>X<sub>16</sub>X<sub>17</sub>X<sub>18</sub>X<sub>19</sub>X<sub>20</sub>X<sub>21</sub>** by the sequences of syn-tasiRNA\_1 and syn-tasiRNA\_2, respectively.

### 2.2.2. Sequence of the syn-tasiRNA oligonucleotides

The sequences of the two syn-tasiRNA oligonucleotides are:

-Sense oligonucleotide (46 b):

**TTTAX<sub>1</sub>X<sub>2</sub>X<sub>3</sub>X<sub>4</sub>X<sub>5</sub>X<sub>6</sub>X<sub>7</sub>X<sub>8</sub>X<sub>9</sub>X<sub>10</sub>X<sub>11</sub>X<sub>12</sub>X<sub>13</sub>X<sub>14</sub>X<sub>15</sub>X<sub>16</sub>X<sub>17</sub>X<sub>18</sub>X<sub>19</sub>X<sub>20</sub>X<sub>21</sub>X<sub>1</sub>X<sub>2</sub>X<sub>3</sub>X<sub>4</sub>X<sub>5</sub>X<sub>6</sub>X<sub>7</sub>  
X<sub>8</sub>X<sub>9</sub>X<sub>10</sub>X<sub>11</sub>X<sub>12</sub>X<sub>13</sub>X<sub>14</sub>X<sub>15</sub>X<sub>16</sub>X<sub>17</sub>X<sub>18</sub>X<sub>19</sub>X<sub>20</sub>X<sub>21</sub>**

-Antisense oligonucleotide (46 b):

**CCGAY<sub>21</sub>Y<sub>20</sub>Y<sub>19</sub>Y<sub>18</sub>Y<sub>17</sub>Y<sub>16</sub>Y<sub>15</sub>Y<sub>14</sub>Y<sub>13</sub>Y<sub>12</sub>Y<sub>11</sub>Y<sub>10</sub>Y<sub>9</sub>Y<sub>8</sub>Y<sub>7</sub>Y<sub>6</sub>Y<sub>5</sub>Y<sub>4</sub>Y<sub>3</sub>Y<sub>2</sub>Y<sub>1</sub>Y<sub>21</sub>Y<sub>20</sub>Y<sub>19</sub>Y<sub>18</sub>Y<sub>17</sub>  
Y<sub>16</sub>Y<sub>15</sub>Y<sub>14</sub>Y<sub>13</sub>Y<sub>12</sub>Y<sub>11</sub>Y<sub>10</sub>Y<sub>9</sub>Y<sub>8</sub>Y<sub>7</sub>Y<sub>6</sub>Y<sub>5</sub>Y<sub>4</sub>Y<sub>3</sub>Y<sub>2</sub>Y<sub>1</sub>**

Where:

- X<sub>1</sub>X<sub>2</sub>X<sub>3</sub>X<sub>4</sub>X<sub>5</sub>X<sub>6</sub>X<sub>7</sub>X<sub>8</sub>X<sub>9</sub>X<sub>10</sub>X<sub>11</sub>X<sub>12</sub>X<sub>13</sub>X<sub>14</sub>X<sub>15</sub>X<sub>16</sub>X<sub>17</sub>X<sub>18</sub>X<sub>19</sub>X<sub>20</sub>X<sub>21</sub>**=syn-tasiRNA-1 sequence
- X<sub>1</sub>X<sub>2</sub>X<sub>3</sub>X<sub>4</sub>X<sub>5</sub>X<sub>6</sub>X<sub>7</sub>X<sub>8</sub>X<sub>9</sub>X<sub>10</sub>X<sub>11</sub>X<sub>12</sub>X<sub>13</sub>X<sub>14</sub>X<sub>15</sub>X<sub>16</sub>X<sub>17</sub>X<sub>18</sub>X<sub>19</sub>X<sub>20</sub>X<sub>21</sub>**=syn-tasiRNA-2 sequence



-**Y<sub>21</sub>Y<sub>20</sub>Y<sub>19</sub>Y<sub>18</sub>Y<sub>17</sub>Y<sub>16</sub>Y<sub>15</sub>Y<sub>14</sub>Y<sub>13</sub>Y<sub>12</sub>Y<sub>11</sub>Y<sub>10</sub>Y<sub>9</sub>Y<sub>8</sub>Y<sub>7</sub>Y<sub>6</sub>Y<sub>5</sub>Y<sub>4</sub>Y<sub>3</sub>Y<sub>2</sub>Y<sub>1</sub>**=syn-tasiRNA-1

reverse-complement sequence

-**Y<sub>21</sub>Y<sub>20</sub>Y<sub>19</sub>Y<sub>18</sub>Y<sub>17</sub>Y<sub>16</sub>Y<sub>15</sub>Y<sub>14</sub>Y<sub>13</sub>Y<sub>12</sub>Y<sub>11</sub>Y<sub>10</sub>Y<sub>9</sub>Y<sub>8</sub>Y<sub>7</sub>Y<sub>6</sub>Y<sub>5</sub>Y<sub>4</sub>Y<sub>3</sub>Y<sub>2</sub>Y<sub>1</sub>**=syn-tasiRNA-2

reverse-complement sequence

### Example

The sequences of the two oligonucleotides to clone syn-tasiRNAs ‘syn-tasiR-Trich’ (**TCCCATTCGATACTGCTCGCC**) and ‘syn-tasiR-Ft’ (**TTGGTTATAAAGGAAGAGGCC**) in positions 3’D3[+] and 3’D4[+] of *AtTAS1c*, respectively, are:

-Sense oligonucleotide (46 b):

**TTTATCCCATTCGATACTGCTCGCCTTGGTTATAAAGGAAGAGGCC**

-Antisense oligonucleotide (46 b):

**CCGAGGCCTCTTCCTTTATAACCAAGGCGAGCAGTATCGAATGGGA**

### 3. Cloning of the syn-tasiRNA sequence(s) in AtTAS1c-D2-B/c-based vectors

*Notes:*

-Available *AtTAS1c-D2-B/c* vectors are listed in Table I at the end of the section.

-*AtTAS1c-D2-B/c-based* vectors must be propagated in a *ccdB* resistant *E. coli* strain such as *DB3.1*.

-Alternatively, *BsaI* digestion of the *B/c* vector and subsequent ligation of the *amiRNA* oligonucleotide insert can be done in separate reactions

#### 3.1. Oligonucleotide annealing

-Dilute sense oligonucleotide and antisense oligonucleotide in sterile H<sub>2</sub>O to a final concentration of 100 μM.

-Prepare Oligo Annealing Buffer:

60 mM Tris-HCl (pH 7.5)

500 mM NaCl

60 mM MgCl<sub>2</sub>

10 mM DTT

**Note:** Prepare 1 ml aliquots of Oligo Annealing Buffer and store at -20°C.

-Assemble the annealing reaction in a PCR tube as described below:

|                                       |            |
|---------------------------------------|------------|
| Forward oligonucleotide (100 $\mu$ M) | 2 $\mu$ L  |
| Reverse oligonucleotide (100 $\mu$ M) | 2 $\mu$ L  |
| Oligo Annealing Buffer                | 46 $\mu$ L |
| Total volume                          | 50 $\mu$ L |

The final concentration of each oligonucleotide is 4  $\mu$ M.

-Use a thermocycler to heat the annealing reaction 5 min at 94°C and then cool down (0.05°C/sec) to 20°C.

-Dilute the annealed oligonucleotides just prior to assembling the digestion-ligation reaction as described below:

|                           |            |
|---------------------------|------------|
| Annealed oligonucleotides | 3 $\mu$ L  |
| dH <sub>2</sub> O         | 37 $\mu$ L |
| Total volume              | 40 $\mu$ L |

The final concentration of each oligonucleotide is 0.15  $\mu$ M.

**Note:** Do not store the diluted oligonucleotides.

### 3.2. Digestion-ligation reaction

- Assemble the digestion-ligation reaction as described below:

|                                   |                   |
|-----------------------------------|-------------------|
| B/c vector (x ug/uL)              | Y $\mu$ L (50 ng) |
| Diluted annealed oligonucleotides | 1 $\mu$ L         |
| 10x T4 DNA ligase buffer          | 1 $\mu$ L         |
| T4 DNA ligase (400 U/ $\mu$ L)    | 1 $\mu$ L         |
| <i>Bsa</i> I (10U/ $\mu$ L, NEB)  | 1 $\mu$ L         |
| dH <sub>2</sub> O                 | to 10 $\mu$ L     |

Total volume 10  $\mu$ L

Prepare a negative control reaction lacking *Bsa*I.

-Mix the reactions by pipetting. Incubate the reactions at room temperature for 5 minutes at 37°C.

### 3.3. *E. coli* transformation and analysis of transformants

-Transform 1-5  $\mu$ l of the digestion-ligation reaction into an *E. coli* strain that doesn't have *ccdB* resistance (e.g. DH10B, TOP10, ...) to do counter-selection.

-Pick two colonies/construct, grow LB-Kan (100 mg/ml) cultures and purify plasmids.

-Sequence with appropriate primers: M13-F  
(CCCAGTCACGACGTTGTAAAACGACGG) and M13-R  
(CAGAGCTGCCAGGAAACAGCTATGACC) for *pENTR*-based vectors; attB1  
(ACAAGTTTGTACAAAAAAGCAGGCT) and attB2  
(ACCACTTTGTACAAGAAAGCTGGGT) primers for *pMDC32B*-based vectors).

**Table I:** *Bsal/ccdB*-based ('B/c') vectors for direct cloning of syn-tasiRNAs downstream position 3'D1[+] in *AtTAS1c* precursor.

| Vector                                 | Small RNA expressed      | Bacterial antibiotic resistance | Plant antibiotic resistance | GATEWAY use | Backbone      | Promoter of syn-tasiRNA cassette | Terminator of syn-tasiRNA cassette | Plant species tested                        |
|----------------------------------------|--------------------------|---------------------------------|-----------------------------|-------------|---------------|----------------------------------|------------------------------------|---------------------------------------------|
| <i>pENTR-AtTAS1c-D2-B/c</i>            | –                        | Kanamycin                       | –                           | Donor       | <i>pENTR</i>  | –                                | –                                  | –                                           |
| <i>pMDC32B-AtTAS1c-D2-B/c</i>          | syn-tasiRNA(s)           | Kanamycin<br>Hygromycin         | Hygromycin                  | –           | <i>pMDC32</i> | <i>CaMV 2x35S</i>                | <i>Nos</i>                         | <i>A. thaliana</i><br><i>N. benthamiana</i> |
| <i>pMDC32B-AtTAS1c-D2-B/c-AtMIR173</i> | syn-tasiRNA(s)<br>miR173 | Kanamycin<br>Hygromycin         | Hygromycin                  | –           | <i>pMDC32</i> | <i>CaMV 2x35S</i>                | <i>nos</i>                         | <i>A. thaliana</i><br><i>N. benthamiana</i> |

**Supplementary Table S1:** Phenotypic penetrance of syn-tasiRNAs expressed in Arabidopsis Col-0 T1 transgenic plants

| Construct                           | T1 analyzed | Phenotypic penetrance <sup>a</sup> |
|-------------------------------------|-------------|------------------------------------|
| <i>35S:syn-tasiR-GUS-D2&amp;D3</i>  | 39          | 0% FT<br>0% Trich                  |
| <i>35S:syn-tasiR-FT-D2-Trich-D3</i> | 16          | 100% FT<br>71% Trich               |
| <i>35S:syn-tasiR-Trich-D2-FT-D3</i> | 18          | 100% FT<br>82% Trich               |
| <i>35S:syn-tasiR-FT-D3-Trich-D4</i> | 48          | 100% FT<br>61% Trich               |
| <i>35S:syn-tasiR-Trich-D3-FT-D4</i> | 34          | 100% FT<br>76% Trich               |

<sup>a</sup> The Ft phenotype was defined as a higher 'days to flowering' value when compared to the average 'days to flowering' value of the *35S:syn-tasiR-GUS-D2&D3* control set.

The Trich phenotype was defined as a higher number of trichomes when compared to transformants of the *35S:syn-tasiR-GUS-D2&D3* control set.

**Supplementary Table S2:** Phenotypic penetrance of syn-tasiRNAs expressed in *A. thaliana* Col-0 T1 transgenic plants

| Construct                               | T1 analyzed | Phenotypic penetrance <sup>a</sup> |
|-----------------------------------------|-------------|------------------------------------|
| <i>35S:AtTAS1c-GUS<sub>Ath</sub>-D2</i> | 77          | 0%                                 |
| <i>35S:AtTAS1c-FT-D2</i>                | 38          | 100%                               |
| <i>35S:AtTAS1c-FT-D3</i>                | 33          | 100%                               |
| <i>35S:TAS1c-FT-D4</i>                  | 66          | 100%                               |
| <i>35S:TAS1c FT-D5</i>                  | 40          | 100%                               |

<sup>a</sup> The Ft phenotype was defined as a higher 'days to flowering' value when compared to the average 'days to flowering' value of the *35S:AtTAS1c-GUS<sub>Ath</sub>-D2* control set.

**Supplementary Table S3:** Phenotypic penetrance of syn-tasiRNAs expressed in Arabidopsis Col-0 T1 transgenic seedlings.

| Construct                               | T1 analyzed | Phenotypic penetrance <sup>a</sup>                |
|-----------------------------------------|-------------|---------------------------------------------------|
| <i>35S:AtTAS1c-GUS<sub>Ath</sub>-D2</i> | 147         | 0%                                                |
| <i>35S:AtTAS1c-CH42-D2</i>              | 106         | 100%<br>1% weak<br>39% intermediate<br>60% severe |
| <i>35S:AtTAS1c-CH42-D3</i>              | 126         | 96%<br>26% weak<br>38% intermediate<br>32% severe |
| <i>35S:TAS1c-CH42-D4</i>                | 171         | 90%<br>30% weak<br>43% intermediate<br>17% severe |
| <i>35S:TAS1c CH42-D5</i>                | 65          | 94%<br>29% weak<br>51% intermediate<br>14% severe |

<sup>a</sup> Ch42 phenotype is scored in 10 days-old seedling and is considered 'weak', 'intermediate' or 'severe' if seedlings have >2 leaves, exactly 2 leaves or no leaves (only 2 cotyledons), respectively.

**Supplementary Table S4.** Summary of results obtained from symptom and DAS-ELISA analyses in *Nicotiana benthamiana* bioassays.

| Sample                                                      | Analysis at 10 dpi       |                          | Analysis at 20 dpi       |                          |
|-------------------------------------------------------------|--------------------------|--------------------------|--------------------------|--------------------------|
|                                                             | Symptomatic plants/Total | DAS-ELISA positive/Total | Symptomatic plants/Total | DAS-ELISA positive/Total |
| <i>35S:GUS</i>                                              | 0/6                      | 0/6                      | 0/6                      | 0/6                      |
| <i>35S:syn-tasiR-GUS</i><br>+ <i>35S:MIR173a</i> + TSWV     | 6/6                      | 6/6                      | 6/6                      | 6/6                      |
| <i>35S:syn-tasiR-TSWV-D2</i><br>+ <i>35S:MIR173a</i> + TSWV | 0/6                      | 0/6                      | 0/6                      | 0/6                      |
| <i>35S:syn-tasiR-TSWV-D3</i><br>+ <i>35S:MIR173a</i> + TSWV | 0/6                      | 1/6                      | 1/6                      | 1/6                      |
| <i>35S:syn-tasiR-TSWV-D4</i><br>+ <i>35S:MIR173a</i> + TSWV | 0/6                      | 1/6                      | 3/6                      | 3/6                      |
| <i>35S:syn-tasiR-TSWV-D5</i><br>+ <i>35S:MIR173a</i> + TSWV | 6/6                      | 6/6                      | 6/6                      | 6/6                      |



**Supplementary Table S5:** Phenotypic penetrance of syn-tasiRNAs expressed in Arabidopsis Col-0 T1 transgenic plants

| Construct                               | T1 analyzed | Phenotypic penetrance <sup>a</sup> |
|-----------------------------------------|-------------|------------------------------------|
| <i>35S:AtTAS1c-GUS<sub>Ath</sub>-D2</i> | 48          | 0%                                 |
| <i>35S:AtTAS1c-FT-D2</i>                | 59          | 100%                               |
| <i>35S:AtTAS1c-FT-D2-1M</i>             | 77          | 100%                               |
| <i>35S:AtTAS1c-FT-D2-2M</i>             | 79          | 97%                                |
| <i>35S:AtTAS1c-FT-D2-3M</i>             | 45          | 89%                                |
| <i>35S:AtTAS1c-FT-D2-4M</i>             | 92          | 59%                                |
| <i>35S:AtTAS1c-FT-D2-5M</i>             | 39          | 8%                                 |

<sup>a</sup> The Ft phenotype was defined as a higher 'days to flowering' value when compared to the average 'days to flowering' value of the *35S:AtTAS1c-GUS<sub>Ath</sub>-D2* control set.

**Supplementary Table S6.** Summary of results obtained from symptom and DAS-ELISA analyses in *Nicotiana benthamiana* bioassays.

| Sample                                                         | Analysis at 10 dpi       |                          | Analysis at 20 dpi       |                          |
|----------------------------------------------------------------|--------------------------|--------------------------|--------------------------|--------------------------|
|                                                                | Symptomatic plants/Total | DAS-ELISA positive/Total | Symptomatic plants/Total | DAS-ELISA positive/Total |
| <i>35S:GUS</i>                                                 | 0/6                      | 0/6                      | 0/6                      | 0/6                      |
| <i>35S:syn-tasiR-GUS</i><br>+ <i>35S:MIR173a</i> + TSWV        | 6/6                      | 6/6                      | 6/6                      | 6/6                      |
| <i>35S:syn-tasiR-TSWV-D2</i> +<br><i>35S:MIR173a</i> + TSWV    | 0/6                      | 0/6                      | 0/6                      | 0/6                      |
| <i>35S:syn-tasiR-TSWV-D2-2M</i><br>+ <i>35S:MIR173a</i> + TSWV | 2/6                      | 3/6                      | 6/6                      | 6/6                      |
| <i>35S:syn-tasiR-TSWV-D2-3M</i><br>+ <i>35S:MIR173a</i> + TSWV | 6/6                      | 6/6                      | 6/6                      | 6/6                      |
| <i>35S:syn-tasiR-TSWV-D2-4M</i><br>+ <i>35S:MIR173a</i> + TSWV | 6/6                      | 6/6                      | 6/6                      | 6/6                      |
| <i>35S:syn-tasiR-TSWV-D2-5M</i><br>+ <i>35S:MIR173a</i> + TSWV | 6/6                      | 6/6                      | 6/6                      | 6/6                      |

**Supplementary Table S7.** Name, sequence and use of DNA oligonucleotides used in this study.

| Oligonucleotide | Sequence                                                                                         | Construct/Aim                                              |
|-----------------|--------------------------------------------------------------------------------------------------|------------------------------------------------------------|
| AC-14           | ATCGCGCGCGGTGTCATCTATGTTACTGAATTC AAGCTT<br>GGCGTGCCTGCA                                         | <i>pMDC32B-AfTAS1c-D2-B/c-MIR173</i><br>(Gibsoon assembly) |
| AC-15           | GGAAACAGCTATGACCATGATTACGAATTCGAATTCAGT<br>AACATAGATGACACCCGC                                    |                                                            |
| AC-49           | AGGACACAATCACGTCTTACA                                                                            | Probe for syn-tasiR-TSWV/syn-tasiR-TSWV-1M detection       |
| AC-55           | AGGGGCCATGCTAATCTTCTC                                                                            | Probe for snoU6 detection                                  |
| AC-82           | TTTATGCGCTTGCTGAGTTTCCCCC                                                                        | <i>35S:syn-tasiR-GUS<sup>Ath</sup>-D2</i>                  |
| AC-83           | CCGAGGGGGAAACTCAGCAAGCGCA                                                                        |                                                            |
| AC-86           | TTTATTGGTTATAAAGGAAGAGGCC                                                                        | <i>35S:syn-tasiR-FT-D2</i>                                 |
| AC-87           | CCGAGGCCTCTTCCTTTATAACCAA                                                                        |                                                            |
| AC-88           | TTTATCGGTGGATCTTAGAAAATTATTCTAAGTCCAACA<br>TAGCGTATTGGTTATAAAGGAAGAGGCC                          | <i>35S:syn-tasiR-FT-D4</i>                                 |
| AC-89           | CCGAGGCCTCTTCCTTTATAACCAATACGCTATGTTGGA<br>CTTAGAATAATTTTCTAAGATCCACCGA                          |                                                            |
| AC-90           | TTTATCGGTGGATCTTAGAAAATTATTCTAAGTCCAACA<br>TAGCGTATTCTAAGTTCAACATATCGACTTGGTTATAAA<br>GGAAGAGGCC | <i>35S:syn-tasiR-FT-D5</i>                                 |
| AC-91           | CCGAGGCCTCTTCCTTTATAACCAAGTCGATATGTTGAA<br>CTTAGAATACGCTATGTTGGACTTAGAATAATTTTCTAA<br>GATCCACCGA |                                                            |
| AC-92           | TTTATTAAGTGTACGGAAATCCCT                                                                         | <i>35S:syn-tasiR-CH42-D2</i>                               |
| AC-93           | CCGAAGGGATTTCCGTGACACTTAA                                                                        |                                                            |
| AC-94           | TTTATCGGTGGATCTTAGAAAATTATTCTAAGTCCAACA<br>TAGCGTATTAAGTGTACGGAAATCCCT                           | <i>35S:syn-tasiR-CH42-D4</i>                               |
| AC-95           | CCGAAGGGATTTCCGTGACACTTAATACGCTATGTTGGA<br>CTTAGAATAATTTTCTAAGATCCACCGA                          |                                                            |
| AC-96           | TTTATCGGTGGATCTTAGAAAATTATTCTAAGTCCAACA<br>TAGCGTATTCTAAGTTCAACATATCGACTTAAGTGTAC<br>GGAAATCCCT  | <i>35S:syn-tasiR-CH42-D5</i>                               |
| AC-97           | CCGAAGGGATTTCCGTGACACTTAAGTCGATATGTTGAA<br>CTTAGAATACGCTATGTTGGACTTAGAATAATTTTCTAA<br>GATCCACCGA |                                                            |
| AC-98           | TTTATTGGTTATAAAGGAAGAGGCCTCCCATTCGATACT<br>GCTCGCC                                               | <i>35S:syn-tasiR-FT-D2-Trich-D3</i>                        |
| AC-99           | CCGAGGCGAGCAGTATCGAATGGGAGGCCTCTTCCTTTA<br>TAACCAA                                               |                                                            |
| AC-100          | TTTATCCCATTCGATACTGCTCGCCTTGGTTATAAAGGA<br>AGAGGCC                                               | <i>35S:syn-tasiR-Trich-D2-FT-D3</i>                        |
| AC-101          | CCGAGGCCTCTTCCTTTATAACCAAGGCGAGCAGTATCG<br>AATGGGA                                               |                                                            |
| AC-102          | TTTATGTAAGACGTGATTGTGTCTT                                                                        | <i>35S:syn-tasiR-TSWV-D2</i>                               |
| AC-103          | CCGAAGGACACAATCACGTCTTACA                                                                        |                                                            |
| AC-104          | TTTATCGGTGGATCTTAGAAAATTATGTAAGACGTGATT<br>GTGTCTT                                               | <i>35S:syn-tasiR-TSWV-D3</i>                               |
| AC-105          | CCGAAGGACACAATCACGTCTTACATAATTTTCTAAGAT<br>CCACCGA                                               |                                                            |
| AC-106          | TTTATCGGTGGATCTTAGAAAATTATTCTAAGTCCAACA<br>TAGCGTATGTAAGACGTGATTGTGTCTT                          | <i>35S:syn-tasiR-TSWV-D4</i>                               |
| AC-107          | CCGAAGGACACAATCACGTCTTACATACGCTATGTTGGA<br>CTTAGAATAATTTTCTAAGATCCACCGA                          |                                                            |

|        |                                                                                                  |                                           |
|--------|--------------------------------------------------------------------------------------------------|-------------------------------------------|
| AC-108 | TTTATCGGTGGATCTTAGAAAATTATTCTAAGTCCAACA<br>TAGCGTATTCTAAGTTCAACATATCGACTGTAAGACGTG<br>ATTGTGTCCT | 35S:syn-tasiR-TSWV-<br>D5                 |
| AC-109 | CCGAAGGACACAATCACGTCTTACAGTCGATATGTTGAA<br>CTTAGAATACGCTATGTTGGACTTAGAATAATTTTCTAA<br>GATCCACCGA |                                           |
| AC-114 | TTTATCGGTGGATCTTAGAAAATTATTGGTTATAAAGGA<br>AGAGGCC                                               | 35S:syn-tasiR-FT-D3                       |
| AC-115 | CCGAGGCCTCTTCCTTTATAACCAATAATTTTCTAAGAT<br>CCACCGA                                               |                                           |
| AC-116 | TTTATCGGTGGATCTTAGAAAATTATTAAGTGTACGGGA<br>AATCCCT                                               | 35S:syn-tasiR-CH42-<br>D3                 |
| AC-117 | CCGAAGGGATTTCCGTGACACTTAATAATTTTCTAAGAT<br>CCACCGA                                               |                                           |
| AC-124 | TTTATTGGTTATAAAGGAAGAGGCCG                                                                       | 35S:syn-tasiR-FT-D2-<br>1M                |
| AC-125 | CCGACGCCTCTTCCTTTATAACCAA                                                                        | 35S:syn-tasiR-FT-D2-<br>2M                |
| AC-126 | TTTATTGGTTATAAAGGAAGAGGGG                                                                        |                                           |
| AC-127 | CCGACCCCTCTTCCTTTATAACCAA                                                                        | 35S:syn-tasiR-FT-D2-<br>3M                |
| AC-128 | TTTATTGGTTATAAAGGAAGAGCGG                                                                        |                                           |
| AC-129 | CCGACCGCTCTTCCTTTATAACCAA                                                                        | 35S:syn-tasiR-FT-D2-<br>4M                |
| AC-130 | TTTATTGGTTATAAAGGAAGACCGG                                                                        |                                           |
| AC-131 | CCGACCGGTCTTCCTTTATAACCAA                                                                        | 35S:syn-tasiR-FT-D2-<br>5M                |
| AC-132 | TTTATTGGTTATAAAGGAAGTCCGG                                                                        |                                           |
| AC-133 | CCGACCGGACTTCCTTTATAACCAA                                                                        | 35S:syn-tasiR-TSWV-<br>D2-2M              |
| AC-138 | TTTATGTAAGACGTGATTGTGTCGT                                                                        |                                           |
| AC-139 | CCGAACGACACAATCACGTCTTACA                                                                        | 35S:syn-tasiR-TSWV-<br>D2-3M              |
| AC-140 | TTTATGTAAGACGTGATTGTGTAGT                                                                        |                                           |
| AC-141 | CCGAACTACACAATCACGTCTTACA                                                                        | 35S:syn-tasiR-TSWV-<br>D2-4M              |
| AC-142 | TTTATGTAAGACGTGATTGTGAAGT                                                                        |                                           |
| AC-143 | CCGAACTCACAATCACGTCTTACA                                                                         | 35S:syn-tasiR-TSWV-<br>D2-5M              |
| AC-144 | TTTATGTAAGACGTGATTGTCAAGT                                                                        |                                           |
| AC-145 | CCGAACTTGACAATCACGTCTTACA                                                                        | syn-tasiR-Trich probe                     |
| AC-156 | GGCGAGCAGTATCGAATGGGA                                                                            |                                           |
| AC-158 | AGGGATTTCCGTGACACTTAA                                                                            | Probe for syn-tasiR-<br>Ch42 detection    |
| AC-157 | GGCCTCTTCCTTTATAACCAA                                                                            | Probe for syn-tasiR-<br>FT detection      |
| AC-190 | CGCCTCTTCCTTTATAACCAA                                                                            | Probe for syn-tasiR-<br>FT-1M detection   |
| AC-191 | CCCCTCTTCCTTTATAACCAA                                                                            | Probe for syn-tasiR-<br>FT-2M detection   |
| AC-192 | CCGCTCTTCCTTTATAACCAA                                                                            | Probe for syn-tasiR-<br>FT-3M detection   |
| AC-193 | CCGGTCTTCCTTTATAACCAA                                                                            | Probe for syn-tasiR-<br>FT-4M detection   |
| AC-194 | CCGGACTTCCTTTATAACCAA                                                                            | Probe for syn-tasiR-<br>FT-5M detection   |
| AC-197 | ACGACACAATCACGTCTTACA                                                                            | Probe for syn-tasiR-<br>TSWV-2M detection |
| AC-198 | ACTACACAATCACGTCTTACA                                                                            | Probe for syn-tasiR-<br>TSWV-3M detection |
| AC-199 | ACTTCACAATCACGTCTTACA                                                                            | Probe for syn-tasiR-<br>TSWV-4M detection |
| AC-200 | ACTTGACAATCACGTCTTACA                                                                            | Probe for syn-tasiR-<br>TSWV-5M detection |
| AC-211 | TTTATATTGACCCACACTTTGCCGA                                                                        | 35S:syn-tasiR-GUS <sub>sty</sub> -<br>D2  |
| AC-212 | CCGATCGGCAAAGTGTGGGTCAATA                                                                        |                                           |
| AC-213 | TTTATGCGCTTGCTGAGTTTCCCCCTGCGCTTGCTGAGT<br>TTCCCCC                                               |                                           |

|        |                                                     |                                                             |
|--------|-----------------------------------------------------|-------------------------------------------------------------|
| AC-214 | CCGAGGGGGAAACTCAGCAAGCGCAGGGGGAAACTCAGC<br>AAGCGCA  | <i>35S:syn-tasiR-GUS<sup>Ath</sup>-D2&amp;D3</i>            |
| AC-267 | GCGGGAAGTCCACCACGGTTA                               | Probe for syn-tasiR-Su<br>detection                         |
| AC-278 | AAAAAGTCAACAAAACCTTAAAGCGGCGGACTCATCGTAA<br>TCTCA   | <i>BsaI</i> mutagenesis in<br><i>MIR173</i>                 |
| AC-284 | TATGCTTTGTTTCAGATTCTGAATCTGACGGACTCCAAATA<br>TTTTTC |                                                             |
| AC-288 | TTTATAACCGTGGTGGACTTCCCGC                           | <i>35S:syn-tasiR-Su</i> ,<br><i>35S:syn-tasiR-Su/MIR173</i> |
| AC-289 | CCGAGCGGGAAGTCCACCACGGTTA                           |                                                             |
| AC-333 | TTTATCTTGTAACGCGCTTTCCAG                            | <i>35S:syn-tasiR-GUS<sup>Nbe</sup>-D2</i>                   |
| AC-334 | CCGACTGGGAAAGCGCGTTACAAGA                           |                                                             |
| D-2042 | GGCGGGTCTCATCGGTGGATCTTAGAAAATTATTCT                | <i>pENTR-AiTAS1c-B/c-D2</i>                                 |
| D-2043 | GGCGGGTCTCTTAAATGGTCTATTCGCTTGTAGAGA                |                                                             |
| D-2698 | GTGATTTCTCTCTGCAAGCGAA                              | Probe for miR173<br>detection                               |

**Supplementary Text S1.** DNA sequence in FASTA format of all *AtTAS1c*-based constructs used to express and analyze syn-tasiRNAs. Sequence corresponding to syn-tasiRNA-1 (position 3'D3[+]) and syn-tasiRNA-2 (position 3'D4[+]) is highlighted in blue and green, respectively. Sequence corresponding miR173 target site, and to tasiRNA D2, D3 and D4 are highlighted in blue, green, dark red and light pink, respectively. All the other sequences from Arabidopsis *TAS1c* gene are highlighted in black.

**>AtTAS1c**

```

AAACCTAAACCTAAACGGCTAAGCCCCGACGTCAAATACCAAAAAGAGAAAAACAAGAGCGCCGTCAGCTC
TGCAAATACGATCTGTAAGTCCATCTTAACACAAAAGTGAGATGGGTTCCTTAGATCATGTTCCGCCGTTAG
ATCGAGTCATGGTCTTGTCATAGAAAGGTACTTTCGTTTACTTCTTTTGAGTATCGAGTAGAGCGTCGT
CTATAGTTAGTTTGAGATTGCGTTTGTGAGAAGTTAGGTTCAATGTCCCGGTCCAATTTTCACCAGCCATG
TGTCAGTTTCGTTCCCTTCCCGTCCCTCTTCTTTGATTTGTTGGGTACGGATGTTTTCGAGATGAAACAGC
ATTGTTTTGTTGTGATTTTCTCTACAAGCGAAATAGACCATTTATTCGGTGGATCTTAGAAAATTAATTTCTAA
GTCCAACATAGCGTAATTTCTAAGTTCAACATATCGACGAAC TAGAAAAGACATTTGGACATATTTCCAGGATAT
GCAAAAAGAAAACAATGAATATTGTTTTGAATGTGTTCAAGTAAATGAGATTTTCAAGTCGTCTAAAGAACA
GTTGCTAATACAGTTACTTATTTCAATAAATAATTGGTTCTAATAATACAAAACATATTCGAGGATATGCA
GAAAAAAGATGTTTGTATTTTGAAGCTTGAGTAGTTTCTCTCCGAGGTGTAGCGAAGAAGCATCATC
TACTTTGTAATGTAATTTTCTTTATGTTTTCACCTTTGTAATTTTATTTGTGTTAATGTACCATGGCCGATA
TCGGTTTTATTGAAAGAAAATTTATGTTACTTCTGTTTTGGCTTTGCAATCAGTTATGCTAGTTTTCTTTAT
ACCCTTTCGTAAGCTTCCTAAGGAATCGTTCATTGATTTCCACTGCTTCATTGTATATTTAAACTTTTACAA
CTGTATCGACCATCATATAATTTCTGGGTCAAGAGATGAAAAATAGAACACCACATCGTAAAGTGAAT
GTGATTTTCTCTACAAGCGAA miR173 target site
TCGGTGGATCTTAGAAAATTA tasiRNA D2
TTCTAAGTCCAACATAGCGTA tasiRNA D3
TTCTAAGTTCAACATATCGAC tasiRNA D4

```

**>AtTAS1c-FT-D2-Trich-D3**

```

AAACCTAAACCTAAACGGCTAAGCCCCGACGTCAAATACCAAAAAGAGAAAAACAAGAGCGCCGTCAGCTC
TGCAAATACGATCTGTAAGTCCATCTTAACACAAAAGTGAGATGGGTTCCTTAGATCATGTTCCGCCGTTAG
ATCGAGTCATGGTCTTGTCATAGAAAGGTACTTTCGTTTACTTCTTTTGAGTATCGAGTAGAGCGTCGT
CTATAGTTAGTTTGAGATTGCGTTTGTGAGAAGTTAGGTTCAATGTCCCGGTCCAATTTTCACCAGCCATG
TGTCAGTTTCGTTCCCTTCCCGTCCCTCTTCTTTGATTTGTTGGGTACGGATGTTTTCGAGATGAAACAGC
ATTGTTTTGTTGTGATTTTCTCTACAAGCGAAATAGACCATTTATTTGGTTATAAAGGAAGAGGCCATCCCAT
TCGATACTGCTCGCCTCGGTGGATCTTAGAAAATTAATTTCTAAGTCCAACATAGCGTAATTTCTAAGTTCAACA
TATCGACGAAC TAGAAAAGACATTTGGACATATTTCCAGGATATGCAAAAAGAAAACAATGAATATTGTTTTGA
ATGTGTTCAAGTAAATGAGATTTTCAAGTCGTCTAAAGAACAGTTGCTAATACAGTTACTTATTTCAATAA
ATAATTGGTTCTAATAATACAAAACATATTCGAGGATATGCAGAAAAAAGATGTTTGTATTTTGAAGAG
CTTGAGTAGTTTCTCTCCGAGGTGTAGCGAAGAAGCATCATCTACTTTGTAATGTAATTTTCTTTATGTTT
TCACTTTGTAATTTTATTTGTGTTAATGTACCATGGCCGATATCGGTTTTATTGAAAGAAAATTTATGTTA
CTTCTGTTTTGGCTTTGCAATCAGTTATGCTAGTTTTCTTATACCCTTTCGTAAGCTTCCTAAGGAATCGT
TCATTGATTTCCACTGCTTCATTGTATATTTAAACTTTTACAACGTATCGACCATCATATAATTTCTGGGTCA
AAGAGATGAAAAATAGAACACCACATCGTAAAGTGAAT
Syn-tasiR-FT: TTGGTTATAAAGGAAGAGGCC
Syn-tasiR-Trich: TCCCATTCGATACTGCTCGCC

```

**>AtTAS1c-Trich-D2-FT-D3**

AAACCTAAACCTAAACGGCTAAGCCCCGACGTCAAATACCAAAAAGAGAAAAACAAGAGCGCCGTCAAGCTC  
TGCAAATACGATCTGTAAGTCCATCTTAACACAAAAGTGAGATGGGTCTTAGATCATGTTCCGCCGTTAG  
ATCGAGTCATGGTCTTGTCTCATAGAAAGGTACTTTCGTTTACTTCTTTTGTAGTATCGAGTAGAGCGTCGT  
CTATAGTTAGTTTGTAGATTGCGTTTGTGAGAAGTTAGGTTCAATGTCCCGGTCCAATTTTACCAGCCATG  
TGTCAGTTTCGTTCCCTCCCGTCCCTCTTCTTTGATTTTCGTTGGGTTACGGATGTTTTTCGAGATGAAACAGC  
ATTGTTTTGTTGTGATTTTTCTCTACAAGCGAAATAGACCATTTATCCCATTCGATACTGCTCGCCTTGGTT  
ATAAAGGAAGAGGCCTCGGTGGATCTTAGAAAATTAATCTAAGTCCAACATAGCGTAATCTAAGTTCAACA  
TATCGACGAAC TAGAAAAGACATTTGGACATATTCAGGATATGCAAAAAGAAAAACAATGAATATTTGTTTTGA  
ATGTGTTCAAGTAAATGAGATTTTCAAGTCGTCTAAAGAACAGTTGCTAATACAGTTACTTATTTCAATAA  
ATAATTTGGTCTAATAAATACAAAACATATTCGAGGATATGCAGAAAAAAGATGTTTGTATTTTGAAG  
CTTGAGTAGTTTCTCTCCGAGGTGTAGCGAAGAAGCATCATCTACTTTGTAATGTAATTTTCTTTATGTTT  
TCACTTTGTAATTTTATTTGTGTTAATGTACCATGGCCGATATCGGTTTTATTGAAAGAAAATTTATGTTA  
CTTCTGTTTTGGCTTTGCAATCAGTTATGCTAGTTTTCTTATACCCTTTCGTAAGCTTCCTAAGGAATCGT  
TCATTGATTTCCACTGCTTCATTGTATATTTAAACTTTACAACGTATCGACCATCATATAATTTCTGGGTC  
AAGAGATGAAAATAGAACACCACATCGTAAAGTGAAT

Syn-tasiR-Trich: TCCCATTCGATACTGCTCGCC

Syn-tasiR-FT: TTGGTTATAAAGGAAGAGGCC

**>AtTAS1c-Trich-D3-FT-D4**

AAACCTAAACCTAAACGGCTAAGCCCCGACGTCAAATACCAAAAAGAGAAAAACAAGAGCGCCGTCAAGCTC  
TGCAAATACGATCTGTAAGTCCATCTTAACACAAAAGTGAGATGGGTCTTAGATCATGTTCCGCCGTTAG  
ATCGAGTCATGGTCTTGTCTCATAGAAAGGTACTTTCGTTTACTTCTTTTGTAGTATCGAGTAGAGCGTCGT  
CTATAGTTAGTTTGTAGATTGCGTTTGTGAGAAGTTAGGTTCAATGTCCCGGTCCAATTTTACCAGCCATG  
TGTCAGTTTCGTTCCCTCCCGTCCCTCTTCTTTGATTTTCGTTGGGTTACGGATGTTTTTCGAGATGAAACAGC  
ATTGTTTTGTTGTGATTTTTCTCTACAAGCGAAATAGACCATTTATCGGTGGATCTTAGAAAATTAATCCCAT  
TCGATACTGCTCGCCTTGGTTATAAAGGAAGAGGCCGAAC TAGAAAAGACATTTGGACATATTCAGGATAT  
GCAAAAAGAAAAACAATGAATATTTGTTTTGAATGTGTTCAAGTAAATGAGATTTTCAAGTCGTCTAAAGAACA  
GTTGCTAATACAGTTACTTATTTCAATAAATAATTTGGTCTAATAATACAAAACATATTCGAGGATATGCA  
GAAAAAAGATGTTTGTATTTTGAAGCTTTGAGTAGTTTCTCTCCGAGGTGTAGCGAAGAAGCATCATC  
TACTTTGTAATGTAATTTTCTTTATGTTTTTCACTTTGTAATTTTATTTGTGTTAATGTACCATGGCCGATA  
TCGGTTTTATTGAAAGAAAATTTATGTTACTTCTGTTTTGGCTTTGCAATCAGTTATGCTAGTTTTCTTTAT  
ACCCTTTCGTAAGCTTCCTAAGGAATCGTTCATTGATTTCCACTGCTTCATTGTATATTTAAACTTTACAA  
CTGTATCGACCATCATATAATTTCTGGGTCAAGAGATGAAAATAGAACACCACATCGTAAAGTGAAT

Syn-tasiR-Trich: TCCCATTCGATACTGCTCGCC

Syn-tasiR-FT: TTGGTTATAAAGGAAGAGGCC

**>AtTAS1c-Ft-D3-Trich-D4**

AAACCTAAACCTAAACGGCTAAGCCCCGACGTCAAATACCAAAAAGAGAAAAACAAGAGCGCCGTCAAGCTC  
TGCAAATACGATCTGTAAGTCCATCTTAACACAAAAGTGAGATGGGTCTTAGATCATGTTCCGCCGTTAG  
ATCGAGTCATGGTCTTGTCTCATAGAAAGGTACTTTCGTTTACTTCTTTTGTAGTATCGAGTAGAGCGTCGT  
CTATAGTTAGTTTGTAGATTGCGTTTGTGAGAAGTTAGGTTCAATGTCCCGGTCCAATTTTACCAGCCATG  
TGTCAGTTTCGTTCCCTCCCGTCCCTCTTCTTTGATTTTCGTTGGGTTACGGATGTTTTTCGAGATGAAACAGC  
ATTGTTTTGTTGTGATTTTTCTCTACAAGCGAAATAGACCATTTATCGGTGGATCTTAGAAAATTAATTTGGTT  
ATAAAGGAAGAGGCCTCCCATTCGATACTGCTCGCCGAAC TAGAAAAGACATTTGGACATATTCAGGATAT  
GCAAAAAGAAAAACAATGAATATTTGTTTTGAATGTGTTCAAGTAAATGAGATTTTCAAGTCGTCTAAAGAACA  
GTTGCTAATACAGTTACTTATTTCAATAAATAATTTGGTCTAATAATACAAAACATATTCGAGGATATGCA  
GAAAAAAGATGTTTGTATTTTGAAGCTTTGAGTAGTTTCTCTCCGAGGTGTAGCGAAGAAGCATCATC  
TACTTTGTAATGTAATTTTCTTTATGTTTTTCACTTTGTAATTTTATTTGTGTTAATGTACCATGGCCGATA  
TCGGTTTTATTGAAAGAAAATTTATGTTACTTCTGTTTTGGCTTTGCAATCAGTTATGCTAGTTTTCTTTAT  
ACCCTTTCGTAAGCTTCCTAAGGAATCGTTCATTGATTTCCACTGCTTCATTGTATATTTAAACTTTACAA  
CTGTATCGACCATCATATAATTTCTGGGTCAAGAGATGAAAATAGAACACCACATCGTAAAGTGAAT

Syn-tasiR-Trich: TCCCATTCGATACTGCTCGCC

Syn-tasiR-FT: TTGGTTATAAAGGAAGAGGCC

>AtTAS1c-GUS<sub>Ath</sub>-D2&D3

```
AAACCTAAACCTAAACGGCTAAGCCCCGACGTCAAATACCAAAAAGAGAAAAACAAGAGCGCCGTCAAGCTC
TGCAAATACGATCTGTAAGTCCATCTTAACACAAAAGTGAGATGGGTCTTAGATCATGTTCCGCCGTTAG
ATCGAGTCATGGTCTTGTCTCATAGAAAGGTACTTTCGTTTACTTCTTTTGTAGTATCGAGTAGAGCGTCGT
CTATAGTTAGTTTGTAGATTGCGTTTGTGAGAAGTTAGGTTCAATGTCCCGGTCCAATTTTCACCAGCCATG
TGTCAGTTTCGTTCCCTCCCGTCCCTCTTCTTTGATTTTCGTTGGGTTACGGATGTTTTTCGAGATGAAACAGC
ATTGTTTTGTTGTGATTTTTCTCTACAAGCGAA TAGACCATTTA TGCGCTTGCTGAGTTTCCCCCTGCGCT
TGCTGAGTTTCCCCCTCGGTGGATCTTAGAAAATTA TTCTAAGTCCAACATAGCGTA TTCTAAGTTCAACA
TATCGAC GAACTAGAAAAGACATTGGACATATTCAGGATATGCAAAAAGAAAAACAATGAATATTTGTTTTGA
ATGTGTTCAAGTAAATGAGATTTTCAAGTTCGTCTAAAGAACAGTTGCTAATACAGTTACTTATTTCAATAA
ATAATTGGTTCATAATAACAAAACATATTCGAGGATATGCAGAAAAAAGATGTTTGTATTTTGAAGAAG
CTTGAGTAGTTTCTCTCCGAGGTGTAGCGAAGAAGCATCATCTACTTTGTAATGTAATTTTCTTTATGTTT
TCACTTTGTAATTTTATTTGTGTTAATGTACCATGGCCGATATCGGTTTTATTGAAAGAAAATTTATGTTA
CTTCTGTTTTGGCTTTGCAATCAGTTATGCTAGTTTTCTTATACCCTTTCGTAAGCTTCCTAAGGAATCGT
CATTGATTTCCACTGCTTCATTTGATATATAAAAACTTTACAACGTATCGACCATCATATAATTTCTGGGTC
AAGAGATGAAAATAGAACACCACATCGTAAAGTGAAT
```

Syn-tasiR-GUS<sub>Ath</sub>: TGCGCTTGCTGAGTTTCCCCC

>AtTAS1c-FT-D2

```
AAACCTAAACCTAAACGGCTAAGCCCCGACGTCAAATACCAAAAAGAGAAAAACAAGAGCGCCGTCAAGCTC
TGCAAATACGATCTGTAAGTCCATCTTAACACAAAAGTGAGATGGGTCTTAGATCATGTTCCGCCGTTAG
ATCGAGTCATGGTCTTGTCTCATAGAAAGGTACTTTCGTTTACTTCTTTTGTAGTATCGAGTAGAGCGTCGT
CTATAGTTAGTTTGTAGATTGCGTTTGTGAGAAGTTAGGTTCAATGTCCCGGTCCAATTTTCACCAGCCATG
TGTCAGTTTCGTTCCCTCCCGTCCCTCTTCTTTGATTTTCGTTGGGTTACGGATGTTTTTCGAGATGAAACAGC
ATTGTTTTGTTGTGATTTTTCTCTACAAGCGAA TAGACCATTTA TTGGTTATAAAGGAAGAGGCC TCGGTG
GATCTTAGAAAATTA TTCTAAGTCCAACATAGCGTA TTCTAAGTTCAACATATCGAC GAACTAGAAAAGAC
ATTGGACATATTCAGGATATGCAAAAAGAAAAACAATGAATATTTGTTTTGAATGTGTTCAAGTAAATGAGAT
TTTCAAGTCGTCTAAAGAACAGTTGCTAATACAGTTACTTATTTCAATAAATAATTGGTTCATAATAATACA
AAACATATTCGAGGATATGCAGAAAAAAGATGTTTGTATTTTGAAGAAGCTTGAGTAGTTTCTCTCCGAG
GTGTAGCGAAGAAGCATCATCTACTTTGTAATGTAATTTTCTTTATGTTTTCACTTTGTAATTTTATTTGT
GTTAATGTACCATGGCCGATATCGGTTTTATTGAAAGAAAATTTATGTTACTTCTGTTTTGGCTTTGCAAT
CAGTTATGCTAGTTTTCTTATACCCTTTCGTAAGCTTCCTAAGGAATCGTTCATTGATTTCCACTGCTTCA
TTGTATATTAAAAACTTTACAACGTATCGACCATCATATAATTTCTGGGTCAAGAGATGAAAATAGAACACC
ACATCGTAAAGTGAAT
```

Syn-tasiR-FT: TTGGTTATAAAGGAAGAGGCC

>AtTAS1c-FT-D3

```
AAACCTAAACCTAAACGGCTAAGCCCCGACGTCAAATACCAAAAAGAGAAAAACAAGAGCGCCGTCAAGCTC
TGCAAATACGATCTGTAAGTCCATCTTAACACAAAAGTGAGATGGGTCTTAGATCATGTTCCGCCGTTAG
ATCGAGTCATGGTCTTGTCTCATAGAAAGGTACTTTCGTTTACTTCTTTTGTAGTATCGAGTAGAGCGTCGT
CTATAGTTAGTTTGTAGATTGCGTTTGTGAGAAGTTAGGTTCAATGTCCCGGTCCAATTTTCACCAGCCATG
TGTCAGTTTCGTTCCCTCCCGTCCCTCTTCTTTGATTTTCGTTGGGTTACGGATGTTTTTCGAGATGAAACAGC
ATTGTTTTGTTGTGATTTTTCTCTACAAGCGAA TAGACCATTTA TCGGTGGATCTTAGAAAATTA TTGGTT
ATAAAGGAAGAGGCC TCGGTGGATCTTAGAAAATTA TTCTAAGTCCAACATAGCGTA TTCTAAGTTCAACA
TATCGAC GAACTAGAAAAGACATTGGACATATTCAGGATATGCAAAAAGAAAAACAATGAATATTTGTTTTGA
ATGTGTTCAAGTAAATGAGATTTTCAAGTTCGTCTAAAGAACAGTTGCTAATACAGTTACTTATTTCAATAA
ATAATTGGTTCATAATAACAAAACATATTCGAGGATATGCAGAAAAAAGATGTTTGTATTTTGAAGAAG
CTTGAGTAGTTTCTCTCCGAGGTGTAGCGAAGAAGCATCATCTACTTTGTAATGTAATTTTCTTTATGTTT
TCACTTTGTAATTTTATTTGTGTTAATGTACCATGGCCGATATCGGTTTTATTGAAAGAAAATTTATGTTA
CTTCTGTTTTGGCTTTGCAATCAGTTATGCTAGTTTTCTTATACCCTTTCGTAAGCTTCCTAAGGAATCGT
```



TCATTGATTTCCACTGCTTCATTGTATATTTAAAACCTTTACAACGTATCGACCATCATATAAATCTGGGTC  
AAGAGATGAAAATAGAACCACCATCGTAAAGTGAAT  
Syn-tasiR-FT: TTGGTTATAAAGGAAGAGGCC

>AtTAS1c-FT-D4

AAACCTAAACCTAAACGGCTAAGCCCCGACGTCAAATACCAAAAAGAGAAAAACAAGAGCGCCGTCAAGCTC  
TGCAAATACGATCTGTAAGTCCATCTTAACACAAAAGTGAGATGGGTCTTAGATCATGTTCCGCCGTAG  
ATCGAGTCATGGTCTTGCTCATAGAAAGGTACTTTCGTTTACTTCTTTTGTAGTATCGAGTAGAGCGTCGT  
CTATAGTTAGTTTGTAGATTGCGTTTGTGAGAAGTTAGGTTCAATGTCCCGGTCCAATTTTCACCAGCCATG  
TGTCAGTTTCGTTCCCTCCCGTCCCTTCTTTGATTTTCGTTGGGTTACGGATGTTTTTCGAGATGAAACAGC  
ATTGTTTTGTTGTGATTTTCTCTACAAGCGAA TAGACCATTTA TCGGTGGATCTTAGAAAAATTA TTCTAA  
GTCCAACATAGCGTA TTGGTTATAAAGGAAGAGGCC TCGGTGGATCTTAGAAAAATTA TTCTAAGTCCAACA  
TAGCGTA TTCTAAGTCCAACATATCGAC GAACTAGAAAAGACATTTGGACATATTCAGGATATGCAAAAAG  
AAACAATGAATATGTTTTGAATGTGTTCAAGTAAATGAGATTTTCAAGTCGTCTAAAGAACAGTTGCTAA  
TACAGTTACTTATTTCAATAAATAAATGGTTCATAATAACAAAACATATTCGAGGATATGCAGAAAAAAA  
GATGTTTGTATTTTGAAGCTTGAGTAGTTTCTCTCCGAGGTGTAGCGAAGAAGCATCATCTACTTTGT  
AATGTAATTTCTTTATGTTTACTTTTCACTTTGTAATTTTATTTGTTGTTAATGTACCATGGCCGATCTCGT  
ATTGAAAGAAAATTTATGTTACTTCTGTTTTGGCTTTGCAATCAGTTATGCTAGTTTTCTTATACCCTTTC  
GTAAGCTTCCTAAGGAATCGTTTCATTGATTTCCACTGCTTCATTGTATATTTAAAACCTTTACAACGTATCG  
ACCATCATATAAATCTGGGTCAAGAGATGAAAATAGAACCACCATCGTAAAGTGAAT  
Syn-tasiR-FT: TTGGTTATAAAGGAAGAGGCC

>AtTAS1c-FT-D5

AAACCTAAACCTAAACGGCTAAGCCCCGACGTCAAATACCAAAAAGAGAAAAACAAGAGCGCCGTCAAGCTC  
TGCAAATACGATCTGTAAGTCCATCTTAACACAAAAGTGAGATGGGTCTTAGATCATGTTCCGCCGTAG  
ATCGAGTCATGGTCTTGCTCATAGAAAGGTACTTTCGTTTACTTCTTTTGTAGTATCGAGTAGAGCGTCGT  
CTATAGTTAGTTTGTAGATTGCGTTTGTGAGAAGTTAGGTTCAATGTCCCGGTCCAATTTTCACCAGCCATG  
TGTCAGTTTCGTTCCCTCCCGTCCCTTCTTTGATTTTCGTTGGGTTACGGATGTTTTTCGAGATGAAACAGC  
ATTGTTTTGTTGTGATTTTCTCTACAAGCGAA TAGACCATTTA TCGGTGGATCTTAGAAAAATTA TTCTAA  
GTCCAACATAGCGTA TTCTAAGTCCAACATATCGAC TTGGTTATAAAGGAAGAGGCC TCGGTGGATCTTAG  
AAAAATTA TTCTAAGTCCAACATAGCGTA TTCTAAGTCCAACATATCGAC GAACTAGAAAAGACATTTGGACA  
TATTCAGGATATGCAAAAAGAAAACAATGAATATGTTTTGAATGTGTTCAAGTAAATGAGATTTTCAAGT  
CGTCTAAAGAACAGTTGCTAATACAGTTACTTATTTCAATAAATAAATGGTTCATAATAACAAAACATAT  
TCGAGGATATGCAGAAAAAAGATGTTTGTATTTTGAAGCTTGAGTAGTTTCTCTCCGAGGTGTAGCG  
AAGAAGCATCATCTACTTTGTAATGTAATTTTCTTTATGTTTTCACTTTGTAATTTTATTTGTGTTAATGT  
ACCATGGCCGATATCGGTTTTTATTGAAAGAAAATTTATGTTACTTCTGTTTTGGCTTTGCAATCAGTTATG  
CTAGTTTTCTTATACCCTTTCGTAAGCTTCCTAAGGAATCGTTTCATTGATTTCCACTGCTTCATTGTATAT  
TAAAACCTTTACAACGTATCGACCATCATATAAATCTGGGTCAAGAGATGAAAATAGAACCACCATCGTA  
AAGTGAAT  
Syn-tasiR-FT: TTGGTTATAAAGGAAGAGGCC

>AtTAS1c-CH42-D2

AAACCTAAACCTAAACGGCTAAGCCCCGACGTCAAATACCAAAAAGAGAAAAACAAGAGCGCCGTCAAGCTC  
TGCAAATACGATCTGTAAGTCCATCTTAACACAAAAGTGAGATGGGTCTTAGATCATGTTCCGCCGTAG  
ATCGAGTCATGGTCTTGCTCATAGAAAGGTACTTTCGTTTACTTCTTTTGTAGTATCGAGTAGAGCGTCGT  
CTATAGTTAGTTTGTAGATTGCGTTTGTGAGAAGTTAGGTTCAATGTCCCGGTCCAATTTTCACCAGCCATG  
TGTCAGTTTCGTTCCCTCCCGTCCCTTCTTTGATTTTCGTTGGGTTACGGATGTTTTTCGAGATGAAACAGC  
ATTGTTTTGTTGTGATTTTCTCTACAAGCGAA TAGACCATTTA TTAAGTGTACCGAAATCCCT TCGGTG  
GATCTTAGAAAAATTA TTCTAAGTCCAACATAGCGTA TTCTAAGTCCAACATATCGAC GAACTAGAAAAGAC  
ATTGGACATATTCAGGATATGCAAAAAGAAAACAATGAATATGTTTTGAATGTGTTCAAGTAAATGAGAT  
TTTCAAGTCGTCTAAAGAACAGTTGCTAATACAGTTACTTATTTCAATAAATAAATGGTTCATAATAACAA  
AAACATATTCAGGATATGCAGAAAAAAGATGTTTGTATTTTGAAGCTTGAGTAGTTTCTCTCCGAG

GTGTAGCGAAGAAGCATCATCTACTTTGTAATGTAATTTTCTTTATGTTTTCACTTTGTAATTTTATTTGT  
GTTAATGTACCATGGCCGATATCGGTTTTATTGAAAGAAAATTTATGTTACTTCTGTTTTGGCTTTGCAAT  
CAGTTATGCTAGTTTTCTTATACCCTTTTCGTAAGCTTCCTAAGGAATCGTTCATTGATTTCCACTGCTTCA  
TTGTATATTTAAACTTTTACAACGTATCGACCATCATATAATTTCTGGGTCAAGAGATGAAAATAGAACACC  
ACATCGTAAAGTGAAAT

Syn-tasiR-AtCH42: TTAAGTGTACGGAAATCCCT

#### >AtTAS1c-CH42-D3

AAACCTAAACCTAAACGGCTAAGCCCCGACGTCAAATACCAAAAAGAGAAAAACAAGAGCGCCGTCAAGCTC  
TGCAAAATACGATCTGTAAGTCCATCTTAACACAAAAGTGAGATGGGTCTTAGATCATGTTCCGCCGTTAG  
ATCGAGTCATGGTCTTGTCTCATAGAAAGGTACTTTCGTTTACTTCTTTTGAGTATCGAGTAGAGCGTCGT  
CTATAGTTAGTTTGAGATTGCGTTTGTGTCAGAAGTTAGGTTCAATGTCCCGGTCCAATTTTCACCAGCCATG  
TGTCAGTTTCGTTCCCTCCCGTCCCTCTTCTTTGATTTTCGTTGGGTACGGATGTTTTCGAGATGAAACAGC  
ATTGTTTTGTTGTGATTTTTCTCTACAAGCGAATAGACCATTTATCGGTGGATCTTAGAAAATTA TTAAGT  
GTCACGGAAATCCCTTCGGTGGATCTTAGAAAATTA TTTCTAAGTCCAACATAGCGTA TTTCTAAGTCCAACA  
TATCGAC GAACTAGAAAAGACATTTGGACATATCCAGGATATGCAAAAAGAAAACAATGAATATGTTTTGA  
ATGTGTTCAAGTAAATGAGATTTTCAAGTCGTCAAAGAACAGTTGCTAATACAGTTACTTATTTCAATAA  
ATAATTTGGTTCTAATAATACAAAACATATTCGAGGATATGCAGAAAAAAGATGTTTGTATTTTGA  
CCTTGAGTAGTTTTCTCTCCGAGGTGTAGCGAAGAAGCATCATCTACTTTGTAATGTAATTTTCTTTATGTTT  
TCACTTTGTAATTTTATTTGTGTTAATGTACCATGGCCGATATCGGTTTTTATTGAAAGAAAATTTATGTTA  
CTTCTGTTTTGGCTTTGCAATCAGTTATGCTAGTTTTCTTATAACCCTTTTCGTAAGCTTCCTAAGGAATCGT  
TCATTGATTTCCACTGCTTCATTGTATATTTAAACTTTTACAACGTATCGACCATCATATAATTTCTGGGT  
AAGAGATGAAAATAGAACACCACATCGTAAAGTGAAAT

Syn-tasiR-CH42: TTAAGTGTACGGAAATCCCT

#### >AtTAS1c-CH42-D4

AAACCTAAACCTAAACGGCTAAGCCCCGACGTCAAATACCAAAAAGAGAAAAACAAGAGCGCCGTCAAGCTC  
TGCAAAATACGATCTGTAAGTCCATCTTAACACAAAAGTGAGATGGGTCTTAGATCATGTTCCGCCGTTAG  
ATCGAGTCATGGTCTTGTCTCATAGAAAGGTACTTTCGTTTACTTCTTTTGAGTATCGAGTAGAGCGTCGT  
CTATAGTTAGTTTGAGATTGCGTTTGTGTCAGAAGTTAGGTTCAATGTCCCGGTCCAATTTTCACCAGCCATG  
TGTCAGTTTCGTTCCCTCCCGTCCCTCTTCTTTGATTTTCGTTGGGTACGGATGTTTTCGAGATGAAACAGC  
ATTGTTTTGTTGTGATTTTTCTCTACAAGCGAATAGACCATTTATCGGTGGATCTTAGAAAATTA TTTCTAA  
GTCCAACATAGCGTA TTAAGTGTACGGAAATCCCTTCGGTGGATCTTAGAAAATTA TTTCTAAGTCCAACA  
TAGCGTA TTTCTAAGTCCAACATATCGAC GAACTAGAAAAGACATTTGGACATATCCAGGATATGCAAAAAG  
AAACAATGAATATTTGTTTTGAATGTGTTCAAGTAAATGAGATTTTCAAGTCGTCAAAGAACAGTTGCTAA  
TACAGTTACTTATTTCAATAAATAATTTGGTTCTAATAATACAAAACATATTCGAGGATATGCAGAAAAA  
GATGTTTGTATTTTGAAGCTTGAGTAGTTTCTCTCCGAGGTGTAGCGAAGAAGCATCATCTACTTTGT  
AATGTAATTTTCTTTATGTTTTCACTTTGTAATTTTATTTGTGTTAATGTACCATGGCCGATATCGGTTTT  
ATTGAAAGAAAATTTATGTTACTTCTGTTTTGGCTTTGCAATCAGTTATGCTAGTTTTCTTATAACCCTTC  
GTAAGCTTCCTAAGGAATCGTTTCAATTTCCACTGCTTCATTGTATATTTAAACTTTTACAACGTATCG  
ACCATCATATAATTTCTGGGTCAAGAGATGAAAATAGAACACCACATCGTAAAGTGAAAT

Syn-tasiR-CH42: TTAAGTGTACGGAAATCCCT

#### >AtTAS1c-CH42-D5

AAACCTAAACCTAAACGGCTAAGCCCCGACGTCAAATACCAAAAAGAGAAAAACAAGAGCGCCGTCAAGCTC  
TGCAAAATACGATCTGTAAGTCCATCTTAACACAAAAGTGAGATGGGTCTTAGATCATGTTCCGCCGTTAG  
ATCGAGTCATGGTCTTGTCTCATAGAAAGGTACTTTCGTTTACTTCTTTTGAGTATCGAGTAGAGCGTCGT  
CTATAGTTAGTTTGAGATTGCGTTTGTGTCAGAAGTTAGGTTCAATGTCCCGGTCCAATTTTCACCAGCCATG  
TGTCAGTTTCGTTCCCTCCCGTCCCTCTTCTTTGATTTTCGTTGGGTACGGATGTTTTCGAGATGAAACAGC  
ATTGTTTTGTTGTGATTTTTCTCTACAAGCGAATAGACCATTTATCGGTGGATCTTAGAAAATTA TTTCTAA  
GTCCAACATAGCGTA TTTCTAAGTCCAACATATCGAC TTAAGTGTACGGAAATCCCTTCGGTGGATCTTAG  
AAAATTA TTTCTAAGTCCAACATAGCGTA TTTCTAAGTCCAACATATCGAC GAACTAGAAAAGACATTTGGACA

TATTCCAGGATATGCAAAAGAAAACAATGAATATTGTTTTGAATGTGTTCAAGTAAATGAGATTTTCAAGT  
CGTCTAAAGAACAGTTGCTAATACAGTTACTTATTTCAATAAATAATTGGTTCATAATAACAAAACATAT  
TCGAGGATATGCAGAAAAAAGATGTTTGTATTTTGAAGGCTTGAGTAGTTTCTCTCCGAGGTGTAGCG  
AAGAAGCATCATCTACTTTGTAATGTAATTTTCTTTATGTTTTCACTTTGTAATTTTATTTGTGTTAATGT  
ACCATGGCCGATATCGGTTTTATTGAAAGAAAATTTATGTTACTTCTGTTTTGGCTTTGCAATCAGTTATG  
CTAGTTTTCTTATACCCTTTCGTAAGCTTCCTAAGGAATCGTTCATTGATTTCCACTGCTTCATTGTATAT  
TAAAACTTTACAACGTATCGACCATCATATAAATCTGGGTCAAGAGATGAAAATAGAACCACCATCGTA  
AAGTGAAT

Syn-tasiR-CH42: TTAAGTGTACGGAAATCCCT

>AtTAS1c-GUS<sub>s1y</sub>-D2

AAACCTAAACCTAAACGGCTAAGCCCCGACGTCAAATACCAAAAAGAGAAAAACAAGAGCGCCGTCAAGCTC  
TGCAAAATACGATCTGTAAGTCCATCTTAACACAAAAGTGAGATGGGTCTTAGATCATGTTCCGCCGTAG  
ATCGAGTCATGGTCTTGTCTCATAGAAAGGTACTTTCGTTTACTTCTTTTGTAGTATCGAGTAGAGCGTCTG  
CTATAGTTAGTTTGTAGATTGCGTTTGTGAGAAGTTAGGTTCAATGTCCCGGTCCAATTTTACCAGCCATG  
TGTCAGTTTCGTTCCCTCCCGTCCCTTCTTTGATTTTCGTTGGGTACGGATGTTTTCGAGATGAAACAGC  
ATTGTTTTGTTGTGATTTTTCTCTACAAGCGA TAGACCATTTA TATTGACCCACACTTTGCCGA TCGGTG  
GATCTTAGAAAATTA TTCTAAGTCCAACATAGCGTA TTCTAAGTTCAACATATCGAC GAACTAGAAAAGAC  
ATTGGACATATTCAGGATATGCAAAAGAAAACAATGAATATTGTTTTGAATGTGTTCAAGTAAATGAGAT  
TTTCAAGTCGTCTAAAGAACAGTTGCTAATACAGTTACTTATTTCAATAAATAATTGGTTCATAATAATACA  
AAACATATTCAGGATATGCAGAAAAAAGATGTTTGTATTTTGAAGGCTTGAGTAGTTTCTCTCCGAG  
GTGTAGCGAAGAAGCATCATCTACTTTGTAATGTAATTTTCTTTATGTTTTCACTTTGTAATTTTATTTGT  
GTTAATGTACCATGGCCGATATCGGTTTTATTGAAAGAAAATTTATGTTACTTCTGTTTTGGCTTTGCAAT  
CAGTTATGCTAGTTTTCTTATACCCTTTCGTAAGCTTCCTAAGGAATCGTTCATTGATTTCCACTGCTTCA  
TTGTATATTTAAAACTTTACAACGTATCGACCATCATATAAATCTGGGTCAAGAGATGAAAATAGAACC  
ACATCGTAAAGTGAAT

Syn-tasiR-GUS<sub>s1y</sub>: TATTGACCCACACTTTGCCGA

>AtTAS1c-TSWV-D2

AAACCTAAACCTAAACGGCTAAGCCCCGACGTCAAATACCAAAAAGAGAAAAACAAGAGCGCCGTCAAGCTC  
TGCAAAATACGATCTGTAAGTCCATCTTAACACAAAAGTGAGATGGGTCTTAGATCATGTTCCGCCGTAG  
ATCGAGTCATGGTCTTGTCTCATAGAAAGGTACTTTCGTTTACTTCTTTTGTAGTATCGAGTAGAGCGTCTG  
CTATAGTTAGTTTGTAGATTGCGTTTGTGAGAAGTTAGGTTCAATGTCCCGGTCCAATTTTACCAGCCATG  
TGTCAGTTTCGTTCCCTCCCGTCCCTTCTTTGATTTTCGTTGGGTACGGATGTTTTCGAGATGAAACAGC  
ATTGTTTTGTTGTGATTTTTCTCTACAAGCGA TAGACCATTTA TGTAAGACGTGATTGTGTCTT TCGGTG  
GATCTTAGAAAATTA TTCTAAGTCCAACATAGCGTA TTCTAAGTTCAACATATCGAC GAACTAGAAAAGAC  
ATTGGACATATTCAGGATATGCAAAAGAAAACAATGAATATTGTTTTGAATGTGTTCAAGTAAATGAGAT  
TTTCAAGTCGTCTAAAGAACAGTTGCTAATACAGTTACTTATTTCAATAAATAATTGGTTCATAATAATACA  
AAACATATTCAGGATATGCAGAAAAAAGATGTTTGTATTTTGAAGGCTTGAGTAGTTTCTCTCCGAG  
GTGTAGCGAAGAAGCATCATCTACTTTGTAATGTAATTTTCTTTATGTTTTCACTTTGTAATTTTATTTGT  
GTTAATGTACCATGGCCGATATCGGTTTTATTGAAAGAAAATTTATGTTACTTCTGTTTTGGCTTTGCAAT  
CAGTTATGCTAGTTTTCTTATACCCTTTCGTAAGCTTCCTAAGGAATCGTTCATTGATTTCCACTGCTTCA  
TTGTATATTTAAAACTTTACAACGTATCGACCATCATATAAATCTGGGTCAAGAGATGAAAATAGAACC  
ACATCGTAAAGTGAAT

Syn-tasiR-TSWV: TGTAAGACGTGATTGTGTCTT

>AtTAS1c-TSWV-D3

AAACCTAAACCTAAACGGCTAAGCCCCGACGTCAAATACCAAAAAGAGAAAAACAAGAGCGCCGTCAAGCTC  
TGCAAAATACGATCTGTAAGTCCATCTTAACACAAAAGTGAGATGGGTCTTAGATCATGTTCCGCCGTAG  
ATCGAGTCATGGTCTTGTCTCATAGAAAGGTACTTTCGTTTACTTCTTTTGTAGTATCGAGTAGAGCGTCTG  
CTATAGTTAGTTTGTAGATTGCGTTTGTGAGAAGTTAGGTTCAATGTCCCGGTCCAATTTTACCAGCCATG  
TGTCAGTTTCGTTCCCTCCCGTCCCTTCTTTGATTTTCGTTGGGTACGGATGTTTTCGAGATGAAACAGC

ATTGTTTTGTTGTGATTTTTCTCTACAAGCGAATAGACCATTTATCGGGTGGATCTTAGAAAAATTA TGTAAG  
ACGTGATTGTGTCTCTCGGGTGGATCTTAGAAAAATTA TTCTAAGTCCAACATAGCGTA TTCTAAGTCCAACA  
TATCGAC GAACTAGAAAAGACATTGGACATATCCAGGATATGCAAAAAGAAAACAATGAATATTGTTTTGA  
ATGTGTTCAAGTAAATGAGATTTTCAAGTCGTCTAAAGAACAGTTGCTAATACAGTTACTTATTTCAATAA  
ATAATTGGTTCTAATAATACAAAACATATTCGAGGATATGCAGAAAAAAGATGTTTGTATTTTGAAAAG  
CTTGAGTAGTTTCTCTCCGAGGTGTAGCGAAGAAGCATCATCTACTTTGTAATGTAATTTTCTTTATGTTT  
TCACTTTGTAATTTTATTTGTGTTAATGTACCATGGCCGATATCGGTTTTATTGAAAGAAAATTTATGTTA  
CTTCTGTTTTGGCTTTGCAATCAGTTATGCTAGTTTTCTTATACCCTTTTCGTAAGCTTCCTAAGGAATCGT  
TCATTGATTTCCACTGCTTCATTGTATATTTAAAACTTTACAACGTATCGACCATCATATAATTTCTGGGTC  
AAGAGATGAAAATAGAACCACACATCGTAAAGTAAAAT  
Syn-tasiR-TSWV: TGTAAGACGTGATTGTGTCTCT

>AtTAS1c-D4-TSWV

AAACCTAAACCTAAACGGCTAAGCCCCGACGTCAAATACCAAAAAGAGAAAAACAAGAGCGCCGTCAAGCTC  
TGCAAAATACGATCTGTAAGTCCATCTTAACACAAAAGTGAGATGGGTTCCTTAGATCATGTTCCGCCGTTAG  
ATCGAGTCATGGTCTTGCTCATAGAAAGGTACTTTCGTTTACTTCTTTTGTAGTATCGAGTAGAGCGTCGT  
CTATAGTTAGTTTGTAGATTGCGTTTGTGAGAAGTTAGGTTCAATGTCCCGGTCCAATTTTACCAGCCATG  
TGTCAGTTTCGTTCCCTCCCGTCCCTCTTCTTTGATTTTCGTTGGGTTACGGATGTTTTCGAGATGAAACAGC  
ATTGTTTTGTTGTGATTTTTCTCTACAAGCGAATAGACCATTTATCGGGTGGATCTTAGAAAAATTA TTCTAA  
GTCCAACATAGCGTA TGTAAGACGTGATTGTGTCTCTCGGGTGGATCTTAGAAAAATTA TTCTAAGTCCAACA  
TAGCGTA TTCTAAGTCCAACATATCGAC GAACTAGAAAAGACATTGGACATATTCAGGATATGCAAAAAGA  
AAACAATGAATATTGTTTTGAATGTGTTCAAGTAAATGAGATTTTCAAGTCGTCTAAAGAACAGTTGCTAA  
TACAGTTACTTATTTCAATAAATAATGGTTCTAATAATACAAAACATATTCGAGGATATGCAGAAAAA  
GATGTTTGTATTTTGAAAAGCTTGAGTAGTTTCTCTCCGAGGTGTAGCGAAGAAGCATCATCTACTTTGT  
AATGTAATTTTCTTTATGTTTTCACTTTGTAATTTTATTTGTGTTAATGTACCATGGCCGATATCGGTTTT  
ATTGAAAGAAAATTTATGTTACTTCTGTTTTGGCTTTGCAATCAGTTATGCTAGTTTTCTTATACCCTTTC  
GTAAGCTTCCTAAGGAATCGTTCATTGATTTCCACTGCTTCATTGTATATTTAAAACTTTACAACGTATCG  
ACCATCATATAATTTCTGGGTCAAGAGATGAAAATAGAACCACACATCGTAAAGTAAAAT  
Syn-tasiR-TSWV: TGTAAGACGTGATTGTGTCTCT

>AtTAS1c-TSWV-D5

AAACCTAAACCTAAACGGCTAAGCCCCGACGTCAAATACCAAAAAGAGAAAAACAAGAGCGCCGTCAAGCTC  
TGCAAAATACGATCTGTAAGTCCATCTTAACACAAAAGTGAGATGGGTTCCTTAGATCATGTTCCGCCGTTAG  
ATCGAGTCATGGTCTTGCTCATAGAAAGGTACTTTCGTTTACTTCTTTTGTAGTATCGAGTAGAGCGTCGT  
CTATAGTTAGTTTGTAGATTGCGTTTGTGAGAAGTTAGGTTCAATGTCCCGGTCCAATTTTACCAGCCATG  
TGTCAGTTTCGTTCCCTCCCGTCCCTCTTCTTTGATTTTCGTTGGGTTACGGATGTTTTCGAGATGAAACAGC  
ATTGTTTTGTTGTGATTTTTCTCTACAAGCGAATAGACCATTTATCGGGTGGATCTTAGAAAAATTA TTCTAA  
GTCCAACATAGCGTA TTCTAAGTCCAACATATCGAC TGTAAGACGTGATTGTGTCTCTCGGGTGGATCTTAG  
AAAAATTA TTCTAAGTCCAACATAGCGTA TTCTAAGTCCAACATATCGAC GAACTAGAAAAGACATTGGACA  
TATTCAGGATATGCAAAAAGAAAACAATGAATATTGTTTTGAATGTGTTCAAGTAAATGAGATTTTCAAGT  
CGTCTAAAGAACAGTTGCTAATACAGTTACTTATTTCAATAAATAATGGTTCTAATAATACAAAACATAT  
TCGAGGATATGCAGAAAAAAGATGTTTGTATTTTAAAAAGCTTGAGTAGTTTCTCTCCGAGGTGTAGCG  
AAGAAGCATCATCTACTTTGTAATGTAATTTTCTTTATGTTTTTCACTTTGTAATTTTATTTGTGTTAATGT  
ACCATGGCCGATATCGGTTTTTATTGAAAGAAAATTTATGTTACTTCTGTTTTGGCTTTGCAATCAGTTATG  
CTAGTTTTCTTATACCCTTTTCGTAAGCTTCCTAAGGAATCGTTCATTGATTTCCACTGCTTCATTGTATAT  
TAAAACTTTACAACGTATCGACCATCATATAATTTCTGGGTCAAGAGATGAAAATAGAACCACACATCGTA  
AAGTAAAAT  
Syn-tasiR-TSWV: TGTAAGACGTGATTGTGTCTCT

>AtTAS1c-FT-D2-1M

AAACCTAAACCTAAACGGCTAAGCCCCGACGTCAAATACCAAAAAGAGAAAAACAAGAGCGCCGTCAAGCTC  
TGCAAAATACGATCTGTAAGTCCATCTTAACACAAAAGTGAGATGGGTTCCTTAGATCATGTTCCGCCGTTAG

ATCGAGTCATGGTCTTGTCTCATAGAAAGGTACTTTCGTTTACTTCTTTTTGAGTATCGAGTAGAGCGTCGT  
CTATAGTTAGTTTGAGATTGCGTTTGTGAGAAGTTAGGTTCAATGTCCCGGTCCAATTTTCACCAGCCATG  
TGTCAGTTTCGTTCCCTTCCCCTCCTTCTTTGATTTTCGTTGGGTTACGGATGTTTTTCGAGATGAAACAGC  
ATTGTTTTGTTGTGATTTTTCTCTACAAGCGAA TAGACCATTTA TTGGTTATAAAGGAAGAGGCC TCGGTG  
GATCTTAGAAAATTA TTCTAAGTCCAACATAGCGTA TTCTAAGTTCAACATATCGAC GAAGTAGAAAAGAC  
ATTGGACATATTCAGGATATGCAAAAAGAAAACAATGAATATTTGTTTGAATGTGTTCAAGTAAATGAGAT  
TTTCAAGTCGTCTAAAGAACAGTTGCTAATACAGTTACTTATTTCAATAAATAATGGTTCTAATAATACA  
AAACATATTCAGGATATGCAGAAAAAAGATGTTTGTATTTTGAAGCTTGAGTAGTTTCTCTCCGAG  
GTGTAGCGAAGAAGCATCATCTACTTTGTAATGTAATTTTCTTTATGTTTTCACTTTGTAATTTTATTTGT  
GTTAATGTACCATGGCCGATATCGGTTTTATTGAAAGAAAATTTATGTTACTTCTGTTTTGGCTTTGCAAT  
CAGTTATGCTAGTTTTCTTATACCCTTTCGTAAGCTTCCTAAGGAATCGTTTATTGATTTCCACTGCTTCA  
TTGTATATTAACCTTTACAACGTATCGACCATCATATAATTTCTGGGTCAAGAGATGAAAATAGAACC  
ACATCGTAAAGTGAAT

Syn-tasiR-FT-1M: TTGGTTATAAAGGAAGAGGCC

>AtTAS1c-FT-D2-2M

AAACCTAAACCTAAACGGCTAAGCCCCGACGTCAAATACCAAAAAGAGAAAAACAAGAGCGCCGTCAAGCTC  
TGCAAAATACGATCTGTAAGTCCATCTTAACACAAAAGTGAGATGGGTTCTTAGATCATGTTCCGCCGTTAG  
ATCGAGTCATGGTCTTGTCTCATAGAAAGGTACTTTCGTTTACTTCTTTTTGAGTATCGAGTAGAGCGTCGT  
CTATAGTTAGTTTGAGATTGCGTTTGTGAGAAGTTAGGTTCAATGTCCCGGTCCAATTTTCACCAGCCATG  
TGTCAGTTTCGTTCCCTTCCCCTCCTTCTTTGATTTTCGTTGGGTTACGGATGTTTTTCGAGATGAAACAGC  
ATTGTTTTGTTGTGATTTTTCTCTACAAGCGAA TAGACCATTTA TTGGTTATAAAGGAAGAGGGG TCGGTG  
GATCTTAGAAAATTA TTCTAAGTCCAACATAGCGTA TTCTAAGTTCAACATATCGAC GAAGTAGAAAAGAC  
ATTGGACATATTCAGGATATGCAAAAAGAAAACAATGAATATTTGTTTGAATGTGTTCAAGTAAATGAGAT  
TTTCAAGTCGTCTAAAGAACAGTTGCTAATACAGTTACTTATTTCAATAAATAATGGTTCTAATAATACA  
AAACATATTCAGGATATGCAGAAAAAAGATGTTTGTATTTTGAAGCTTGAGTAGTTTCTCTCCGAG  
GTGTAGCGAAGAAGCATCATCTACTTTGTAATGTAATTTTCTTTATGTTTTCACTTTGTAATTTTATTTGT  
GTTAATGTACCATGGCCGATATCGGTTTTATTGAAAGAAAATTTATGTTACTTCTGTTTTGGCTTTGCAAT  
CAGTTATGCTAGTTTTCTTATACCCTTTCGTAAGCTTCCTAAGGAATCGTTTATTGATTTCCACTGCTTCA  
TTGTATATTAACCTTTACAACGTATCGACCATCATATAATTTCTGGGTCAAGAGATGAAAATAGAACC  
ACATCGTAAAGTGAAT

Syn-tasiR-FT-2M: TTGGTTATAAAGGAAGAGGGG

>AtTAS1c-FT-D2-3M

AAACCTAAACCTAAACGGCTAAGCCCCGACGTCAAATACCAAAAAGAGAAAAACAAGAGCGCCGTCAAGCTC  
TGCAAAATACGATCTGTAAGTCCATCTTAACACAAAAGTGAGATGGGTTCTTAGATCATGTTCCGCCGTTAG  
ATCGAGTCATGGTCTTGTCTCATAGAAAGGTACTTTCGTTTACTTCTTTTTGAGTATCGAGTAGAGCGTCGT  
CTATAGTTAGTTTGAGATTGCGTTTGTGAGAAGTTAGGTTCAATGTCCCGGTCCAATTTTCACCAGCCATG  
TGTCAGTTTCGTTCCCTTCCCCTCCTTCTTTGATTTTCGTTGGGTTACGGATGTTTTTCGAGATGAAACAGC  
ATTGTTTTGTTGTGATTTTTCTCTACAAGCGAA TAGACCATTTA TTGGTTATAAAGGAAGAGCGG TCGGTG  
GATCTTAGAAAATTA TTCTAAGTCCAACATAGCGTA TTCTAAGTTCAACATATCGAC GAAGTAGAAAAGAC  
ATTGGACATATTCAGGATATGCAAAAAGAAAACAATGAATATTTGTTTGAATGTGTTCAAGTAAATGAGAT  
TTTCAAGTCGTCTAAAGAACAGTTGCTAATACAGTTACTTATTTCAATAAATAATGGTTCTAATAATACA  
AAACATATTCAGGATATGCAGAAAAAAGATGTTTGTATTTTGAAGCTTGAGTAGTTTCTCTCCGAG  
GTGTAGCGAAGAAGCATCATCTACTTTGTAATGTAATTTTCTTTATGTTTTCACTTTGTAATTTTATTTGT  
GTTAATGTACCATGGCCGATATCGGTTTTATTGAAAGAAAATTTATGTTACTTCTGTTTTGGCTTTGCAAT  
CAGTTATGCTAGTTTTCTTATACCCTTTCGTAAGCTTCCTAAGGAATCGTTTATTGATTTCCACTGCTTCA  
TTGTATATTAACCTTTACAACGTATCGACCATCATATAATTTCTGGGTCAAGAGATGAAAATAGAACC  
ACATCGTAAAGTGAAT

Syn-tasiR-FT-3M: TTGGTTATAAAGGAAGAGCGG

>AtTAS1c-FT-D2-4M

AAACCTAAACCTAAACGGCTAAGCCCCGACGTCAAATACCAAAAAGAGAAAAACAAGAGCGCCGTCAAGCTC  
TGCAAATACGATCTGTAAGTCCATCTTAACACAAAAGTGAGATGGGTTCTTAGATCATGTTCCGCCGTTAG  
ATCGAGTCATGGTCTTGTCTCATAGAAAGGTACTTTCGTTTACTTCTTTTGGAGTATCGAGTAGAGCGTCGT  
CTATAGTTAGTTTGGAGATTGCGTTTGTGAGAAGTTAGGTTCAATGTCCCGGTCCAATTTTACCAGCCATG  
TGTCAGTTTCGTTCCCTTCCCCTCCTCTTCTTTGATTTTCGTTGGGTTACGGATGTTTTCCGAGATGAAACAGC  
ATTGTTTTGTTGTGATTTTTCTCTACAAGCGAA TAGACCATTTA TTGGTTATAAAGGAAGACCGGTCGGTG  
GATCTTAGAAAAATTA TTCTAAGTCCAACATAGCGTA TTCTAAGTTCAACATATCGAC GAACTAGAAAAGAC  
ATTGGACATATCCAGGATATGCAAAAAGAAAACAATGAATATTGTTTTGAATGTGTTCAAGTAAATGAGAT  
TTTCAAGTCGTCTAAAGAACAGTTGCTAATACAGTTACTTATTTCAATAAATAATTTGGTTCTAATAATACA  
AAACATATTCGAGGATATGCAGAAAAAAGATGTTTTGTTATTTTAAAAGCTTGAGTAGTTTCTCTCCGAG  
GTGTAGCGAAGAAGCATCATCTACTTTGTAATGTAATTTTCTTTATGTTTTCACTTTGTAATTTTATTTGT  
GTTAATGTACCATGGCCGATATCGGTTTTATTGAAAGAAAATTTATGTTACTTCTGTTTTGGCTTTTGCAAT  
CAGTTATGCTAGTTTTCTTATACCCTTTCGTAAGCTTCCTAAGGAATCGTTTCATTGATTTCCACTGCTTCA  
TTGTATATTAATACTTTACAACGTATCGACCATCATATAATTTCTGGGTCAAGAGATGAAAAATAGAACC  
ACATCGTAAAGTGAAT

Syn-tasiR-FT-4M: TTGGTTATAAAGGAAGACCGG

>AtTAS1c-FT-D2-5M

AAACCTAAACCTAAACGGCTAAGCCCCGACGTCAAATACCAAAAAGAGAAAAACAAGAGCGCCGTCAAGCTC  
TGCAAATACGATCTGTAAGTCCATCTTAACACAAAAGTGAGATGGGTTCTTAGATCATGTTCCGCCGTTAG  
ATCGAGTCATGGTCTTGTCTCATAGAAAGGTACTTTCGTTTACTTCTTTTGGAGTATCGAGTAGAGCGTCGT  
CTATAGTTAGTTTGGAGATTGCGTTTGTGAGAAGTTAGGTTCAATGTCCCGGTCCAATTTTACCAGCCATG  
TGTCAGTTTCGTTCCCTTCCCCTCCTCTTCTTTGATTTTCGTTGGGTTACGGATGTTTTCCGAGATGAAACAGC  
ATTGTTTTGTTGTGATTTTTCTCTACAAGCGAA TAGACCATTTA TTGGTTATAAAGGAAGTCCGGTCGGTG  
GATCTTAGAAAAATTA TTCTAAGTCCAACATAGCGTA TTCTAAGTTCAACATATCGAC GAACTAGAAAAGAC  
ATTGGACATATCCAGGATATGCAAAAAGAAAACAATGAATATTGTTTTGAATGTGTTCAAGTAAATGAGAT  
TTTCAAGTCGTCTAAAGAACAGTTGCTAATACAGTTACTTATTTCAATAAATAATTTGGTTCTAATAATACA  
AAACATATTCGAGGATATGCAGAAAAAAGATGTTTTGTTATTTTAAAAGCTTGAGTAGTTTCTCTCCGAG  
GTGTAGCGAAGAAGCATCATCTACTTTGTAATGTAATTTTCTTTATGTTTTCACTTTGTAATTTTATTTGT  
GTTAATGTACCATGGCCGATATCGGTTTTATTGAAAGAAAATTTATGTTACTTCTGTTTTGGCTTTTGCAAT  
CAGTTATGCTAGTTTTCTTATACCCTTTCGTAAGCTTCCTAAGGAATCGTTTCATTGATTTCCACTGCTTCA  
TTGTATATTAATACTTTACAACGTATCGACCATCATATAATTTCTGGGTCAAGAGATGAAAAATAGAACC  
ACATCGTAAAGTGAAT

Syn-tasiR-FT-5M: TTGGTTATAAAGGAAGTCCGG

>AtTAS1c-TSWV-D2-2M

AAACCTAAACCTAAACGGCTAAGCCCCGACGTCAAATACCAAAAAGAGAAAAACAAGAGCGCCGTCAAGCTC  
TGCAAATACGATCTGTAAGTCCATCTTAACACAAAAGTGAGATGGGTTCTTAGATCATGTTCCGCCGTTAG  
ATCGAGTCATGGTCTTGTCTCATAGAAAGGTACTTTCGTTTACTTCTTTTGGAGTATCGAGTAGAGCGTCGT  
CTATAGTTAGTTTGGAGATTGCGTTTGTGAGAAGTTAGGTTCAATGTCCCGGTCCAATTTTACCAGCCATG  
TGTCAGTTTCGTTCCCTTCCCCTCCTCTTCTTTGATTTTCGTTGGGTTACGGATGTTTTCCGAGATGAAACAGC  
ATTGTTTTGTTGTGATTTTTCTCTACAAGCGAA TAGACCATTTA TGTAAGACGTGATTGTGTCGT TCCGGTG  
GATCTTAGAAAAATTA TTCTAAGTCCAACATAGCGTA TTCTAAGTTCAACATATCGAC GAACTAGAAAAGAC  
ATTGGACATATCCAGGATATGCAAAAAGAAAACAATGAATATTGTTTTGAATGTGTTCAAGTAAATGAGAT  
TTTCAAGTCGTCTAAAGAACAGTTGCTAATACAGTTACTTATTTCAATAAATAATTTGGTTCTAATAATACA  
AAACATATTCGAGGATATGCAGAAAAAAGATGTTTTGTTATTTTAAAAGCTTGAGTAGTTTCTCTCCGAG  
GTGTAGCGAAGAAGCATCATCTACTTTGTAATGTAATTTTCTTTATGTTTTCACTTTGTAATTTTATTTGT  
GTTAATGTACCATGGCCGATATCGGTTTTATTGAAAGAAAATTTATGTTACTTCTGTTTTGGCTTTTGCAAT  
CAGTTATGCTAGTTTTCTTATACCCTTTCGTAAGCTTCCTAAGGAATCGTTTCATTGATTTCCACTGCTTCA  
TTGTATATTAATACTTTACAACGTATCGACCATCATATAATTTCTGGGTCAAGAGATGAAAAATAGAACC  
ACATCGTAAAGTGAAT

Syn-tasiR-TSWV-2M: TGTAAGACGTGATTGTGTCGT

>AtTAS1c-TSWV-D2-3M

AAACCTAAACCTAAACGGCTAAGCCCCGACGTCAAATACCAAAAAGAGAAAAACAAGAGCGCCGTCAAGCTC  
TGCAAATACGATCTGTAAGTCCATCTTAACACAAAAGTGAGATGGGTTCTTAGATCATGTTCCGCCGTTAG  
ATCGAGTCATGGTCTTGTCTCATAGAAAGGTACTTTCGTTTACTTCTTTTGAGTATCGAGTAGAGCGTCGT  
CTATAGTTAGTTTGAGATTGCGTTTGTGAGAAGTTAGGTTCAATGTCCCGGTCCAATTTTCACCAGCCATG  
TGTCAGTTTCGTTCCCTTCCCCTCCTCTTCTTTGATTTTCGTTGGGTTACGGATGTTTTTCGAGATGAAACAGC  
ATTGTTTTGTTGTGATTTTTCTCTACAAGCGAA TAGACCATTTA TGTAAGACGTGATTGTGTAGT TCGGTG  
GATCTTAGAAAATTA TTCTAAGTCCAACATAGCGTA TTCTAAGTTCAACATATCGAC GAACTAGAAAAGAC  
ATTGGACATATTCAGGATATGCAAAAAGAAAACAATGAATATTGTTTTGAATGTGTTCAAGTAAATGAGAT  
TTTCAAGTCGTCTAAAGAACAGTTGCTAATACAGTTACTTATTTCAATAAATAATTTGGTTCCTAATAATACA  
AAACATATTCGAGGATATGCAGAAAAAAGATGTTTGTATTTTGAAAAGCTTGAGTAGTTTCTCTCCGAG  
GTGTAGCGAAGAAGCATCATCTACTTTGTAATGTAATTTTCTTTATGTTTTCACTTTGTAATTTTATTTGT  
GTTAATGTACCATGGCCGATATCGGTTTTATTGAAAGAAAATTTATGTTACTTCTGTTTTGGCTTTGCAAT  
CAGTTATGCTAGTTTTCTTATACCCTTTCGTAAGCTTCCTAAGGAATCGTTCATTGATTTCCACTGCTTCA  
TTGTATATTA AAACTTTACAACGTATCGACCATCATATAATTTCTGGGTCAAGAGATGAAAATAGAACC  
ACATCGTAAAGTGAAAT

Syn-tasiR-TSWV-3M: TGTAAGACGTGATTGTGTAGT

>AtTAS1c-TSWV-D2-4M

AAACCTAAACCTAAACGGCTAAGCCCCGACGTCAAATACCAAAAAGAGAAAAACAAGAGCGCCGTCAAGCTC  
TGCAAATACGATCTGTAAGTCCATCTTAACACAAAAGTGAGATGGGTTCTTAGATCATGTTCCGCCGTTAG  
ATCGAGTCATGGTCTTGTCTCATAGAAAGGTACTTTCGTTTACTTCTTTTGAGTATCGAGTAGAGCGTCGT  
CTATAGTTAGTTTGAGATTGCGTTTGTGAGAAGTTAGGTTCAATGTCCCGGTCCAATTTTCACCAGCCATG  
TGTCAGTTTCGTTCCCTTCCCCTCCTCTTCTTTGATTTTCGTTGGGTTACGGATGTTTTTCGAGATGAAACAGC  
ATTGTTTTGTTGTGATTTTTCTCTACAAGCGAA TAGACCATTTA TGTAAGACGTGATTGTGAAGT TCGGTG  
GATCTTAGAAAATTA TTCTAAGTCCAACATAGCGTA TTCTAAGTTCAACATATCGAC GAACTAGAAAAGAC  
ATTGGACATATTCAGGATATGCAAAAAGAAAACAATGAATATTGTTTTGAATGTGTTCAAGTAAATGAGAT  
TTTCAAGTCGTCTAAAGAACAGTTGCTAATACAGTTACTTATTTCAATAAATAATTTGGTTCCTAATAATACA  
AAACATATTCGAGGATATGCAGAAAAAAGATGTTTGTATTTTGAAAAGCTTGAGTAGTTTCTCTCCGAG  
GTGTAGCGAAGAAGCATCATCTACTTTGTAATGTAATTTTCTTTATGTTTTCACTTTGTAATTTTATTTGT  
GTTAATGTACCATGGCCGATATCGGTTTTATTGAAAGAAAATTTATGTTACTTCTGTTTTGGCTTTGCAAT  
CAGTTATGCTAGTTTTCTTATACCCTTTCGTAAGCTTCCTAAGGAATCGTTCATTGATTTCCACTGCTTCA  
TTGTATATTA AAACTTTACAACGTATCGACCATCATATAATTTCTGGGTCAAGAGATGAAAATAGAACC  
ACATCGTAAAGTGAAAT

Syn-tasiR-TSWV-4M: TGTAAGACGTGATTGTGAAGT

>AtTAS1c-TSWV-D2-5M

AAACCTAAACCTAAACGGCTAAGCCCCGACGTCAAATACCAAAAAGAGAAAAACAAGAGCGCCGTCAAGCTC  
TGCAAATACGATCTGTAAGTCCATCTTAACACAAAAGTGAGATGGGTTCTTAGATCATGTTCCGCCGTTAG  
ATCGAGTCATGGTCTTGTCTCATAGAAAGGTACTTTCGTTTACTTCTTTTGAGTATCGAGTAGAGCGTCGT  
CTATAGTTAGTTTGAGATTGCGTTTGTGAGAAGTTAGGTTCAATGTCCCGGTCCAATTTTCACCAGCCATG  
TGTCAGTTTCGTTCCCTTCCCCTCCTCTTCTTTGATTTTCGTTGGGTTACGGATGTTTTTCGAGATGAAACAGC  
ATTGTTTTGTTGTGATTTTTCTCTACAAGCGAA TAGACCATTTA TGTAAGACGTGATTGTCAAGT TCGGTG  
GATCTTAGAAAATTA TTCTAAGTCCAACATAGCGTA TTCTAAGTTCAACATATCGAC GAACTAGAAAAGAC  
ATTGGACATATTCAGGATATGCAAAAAGAAAACAATGAATATTGTTTTGAATGTGTTCAAGTAAATGAGAT  
TTTCAAGTCGTCTAAAGAACAGTTGCTAATACAGTTACTTATTTCAATAAATAATTTGGTTCCTAATAATACA  
AAACATATTCGAGGATATGCAGAAAAAAGATGTTTGTATTTTGAAAAGCTTGAGTAGTTTCTCTCCGAG  
GTGTAGCGAAGAAGCATCATCTACTTTGTAATGTAATTTTCTTTATGTTTTCACTTTGTAATTTTATTTGT  
GTTAATGTACCATGGCCGATATCGGTTTTATTGAAAGAAAATTTATGTTACTTCTGTTTTGGCTTTGCAAT  
CAGTTATGCTAGTTTTCTTATACCCTTTCGTAAGCTTCCTAAGGAATCGTTCATTGATTTCCACTGCTTCA  
TTGTATATTA AAACTTTACAACGTATCGACCATCATATAATTTCTGGGTCAAGAGATGAAAATAGAACC  
ACATCGTAAAGTGAAAT

Syn-tasiR-TSWV-5M: TGTAAGACGTGATTGTCAAGT

>AtTAS1c-GUS<sub>Nb</sub>-D2

```
AAACCTAAACCTAAACGGCTAAGCCCCGACGTCAAATACCAAAAAGAGAAAAACAAGAGCGCCGTCAAGCTC
TGCAAATACGATCTGTAAGTCCATCTTAACACAAAAGTGAGATGGGTTCCTTAGATCATGTTCCGCCGTTAG
ATCGAGTCATGGTCTTGTCTCATAGAAAGGTACTTTCGTTTACTTCTTTTGAGTATCGAGTAGAGCGTCGT
CTATAGTTAGTTTGAGATTGCGTTTGTGAGAAGTTAGGTTCAATGTCCCGGTCCAATTTTCACCAGCCATG
TGTGAGTTTCGTTCCCTTCCCGTCCCTCTTCTTTGATTTGTTGGGTTACGGATGTTTTCGAGATGAAACAGC
ATTGTTTTGTTGTGATTTTTCTCTACAAGCGAA TAGACCATTTA TCTTGTAACGCGCTTTCCAG TCGGTG
GATCTTAGAAAATTA TTCTAAGTCCAACATAGCGTA TTCTAAGTTCAACATATCGAC GAACTAGAAAAGAC
ATTGGACATATTCAGGATATGCAAAAAGAAAACAATGAATATTGTTTTGAATGTGTTCAAGTAAATGAGAT
TTTCAAGTCGTCTAAAGAACAGTTGCTAATACAGTTACTTATTTCAATAAATAATTGGTTCCTAATAATACA
AAACATATTCGAGGATATGCAGAAAAAAGATGTTTGTTATTTTGAAAAGCTTGAGTAGTTTCTCTCCGAG
GTGTAGCGAAGAAGCATCATCTACTTTGTAATGTAATTTTCTTTATGTTTTCACTTTGTAATTTTATTTGT
GTTAATGTACCATGGCCGATATCGGTTTTATTGAAAGAAAATTTATGTTACTTCTGTTTTGGCTTTGCAAT
CAGTTATGCTAGTTTTCTTATACCCTTTCGTAAGCTTCCTAAGGAATCGTTCATTGATTTCCACTGCTTCA
TTGTATATTAACCTTTACAACGTATCGACCATCATATAAATCTGGGTCAAGAGATGAAAATAGAACACC
ACATCGTAAAGTGAAT
```

Syn-tasiR-GUS<sub>Nb</sub>: TCTTGTAACGCGCTTTCCAG

>AtTAS1c-Su-D2

```
AAACCTAAACCTAAACGGCTAAGCCCCGACGTCAAATACCAAAAAGAGAAAAACAAGAGCGCCGTCAAGCTC
TGCAAATACGATCTGTAAGTCCATCTTAACACAAAAGTGAGATGGGTTCCTTAGATCATGTTCCGCCGTTAG
ATCGAGTCATGGTCTTGTCTCATAGAAAGGTACTTTCGTTTACTTCTTTTGAGTATCGAGTAGAGCGTCGT
CTATAGTTAGTTTGAGATTGCGTTTGTGAGAAGTTAGGTTCAATGTCCCGGTCCAATTTTCACCAGCCATG
TGTGAGTTTCGTTCCCTTCCCGTCCCTCTTCTTTGATTTGTTGGGTTACGGATGTTTTCGAGATGAAACAGC
ATTGTTTTGTTGTGATTTTTCTCTACAAGCGAA TAGACCATTTA TAACCGTGGTGGACTTCCCGC TCGGTG
GATCTTAGAAAATTA TTCTAAGTCCAACATAGCGTA TTCTAAGTTCAACATATCGAC GAACTAGAAAAGAC
ATTGGACATATTCAGGATATGCAAAAAGAAAACAATGAATATTGTTTTGAATGTGTTCAAGTAAATGAGAT
TTTCAAGTCGTCTAAAGAACAGTTGCTAATACAGTTACTTATTTCAATAAATAATTGGTTCCTAATAATACA
AAACATATTCGAGGATATGCAGAAAAAAGATGTTTGTTATTTTGAAAAGCTTGAGTAGTTTCTCTCCGAG
GTGTAGCGAAGAAGCATCATCTACTTTGTAATGTAATTTTCTTTATGTTTTCACTTTGTAATTTTATTTGT
GTTAATGTACCATGGCCGATATCGGTTTTATTGAAAGAAAATTTATGTTACTTCTGTTTTGGCTTTGCAAT
CAGTTATGCTAGTTTTCTTATACCCTTTCGTAAGCTTCCTAAGGAATCGTTCATTGATTTCCACTGCTTCA
TTGTATATTAACCTTTACAACGTATCGACCATCATATAAATCTGGGTCAAGAGATGAAAATAGAACACC
ACATCGTAAAGTGAAT
```

Syn-tasiR-Su: TAACCGTGGTGGACTTCCCGC



**Supplementary Text S2.** DNA sequence of *BsaI-ccdB*-based (B/c) vectors used for direct cloning of syn-tasiRNAs downstream of 3'D1[+] position in *AtTAS1c*.

**>pENTR-AtTAS1c-D2-B/c (5031 bp)**

CTTTCCTGCGTTATCCCCTGATTCTGTGGATAACCGTATTACCGCCTTTGAGTGAGCTGATACCGCTCGC  
CGCAGCCGAACGACCGAGCGCAGCGAGTCAGTGAGCGAGGAAGCGGAAGAGCGCCCAATACGCAAACCGC  
CTCTCCCCGCGGTTGGCCGATTCATTAATGCAGCTGGCAGCAGAGTTTCCCAGCTGGAAAGCGGGCAG  
TGAGCGCAACGCAATTAATACGCGTACCGCTAGCCAGGAAGAGTTTGTAGAAACGAAAAAGGCCATCCG  
TCAGGATGGCCTTCTGCTTAGTTTGATGCCTGGCAGTTTATGGCGGGCGTCTGCCCGCCACCTCCGGG  
CCGTTGCTTACAACGTTCAAATCCGCTCCCAGCGGATTTGTCTACTCAGGAGAGCGTTCACCGACAAA  
CAACAGATAAAAACGAAAGGCCAGTCTTCCGACTGAGCCTTTCGTTTTATTTGATGCCTGGCAGTTCCCT  
ACTCTCGCGTTAACGCTAGCATGGATGTTTTCCAGTCACGACGTTGTAACGACGCGCCAGTCTTAAGC  
TCGGGCCCAAATAATGATTTTATTTGACTGATAGTGACCTGTTTCGTTGCAACAAATTTGATGAGCAATG  
CTTTTTTATAATGCCAACTTTGTACAAAAAGCAGGCTCCGCGGCCGCCCTTACC AAACCTAAACCT  
AAACGGCTAAGCCCGACGTCAAATACCAAAAAGAGAAAAACAAGAGCGCCGTCAAGCTCTGCAAATACGA  
TCTGTAAGTCCATCTTAACACAAAAGTGAGATGGGTTCTTAGATCATGTTCCGCCGTTAGATCGAGTCAT  
GGTCTTGTCTCATAGAAAAGTACTTTTCGTTTACTTCTTTTGAGTATCGAGTAGAGCGTCGTCTATAGTTA  
GTTTGAGATTGCGTTTGTGAGAAGTTAGGTTCAATGTCCCGTCCAATTTTCACCAGCCATGTGTCAGTT  
TCGTTCCCTCCCGTCTCTTTGATTTTCGTTGGGTTACGGATGTTTTCGAGATGAAACAGCATTGTTT  
TGTTGTGATTTTTCTCTACAAGCGAATAGACCATTTAAGAGACCATTAGGCACCCAGGCTTTACACTTT  
ATGCTTCCGGCTCGTATAATGTGTGGATTTTGTAGTTAGGAGCCGTCGAGATTTTCAGGAGCTAAGGAAGC  
TAAAatggagaaaaaatcactggatataaccaccgttgatataatcccaatggcatcgtaagaacat  
gaggcatttcagtcagttgctcaatgtacctataaccagaccgttcagctggatattacggcctttttaa  
agaccgtaagaaaaataagcacaagtttatccggcctttattcacattcttggccgctgatgaatgc  
tcatccggagttccgatggcaatgaaagacggtgagctggtgatatgggatagtgttcaccctgtttac  
accgttttccatgagcaaaactgaaacgttttcatcgctctggagtgaataccacgacgatttccggcagt  
ttctacacatatattcgcaagatgtggcgtgttacggtgaaaacctggcctatttccctaaaggtttat  
tgagaatatgttttctcagccaatccctgggtgagtttaccagttttgatttaaactggccaat  
atggacaacttcttcgccccggttttaccatgggcaaatattatacgaaggcgacaaggtgctgatgc  
cgctggcgattcaggttcatcatgcccgtttgtgatggcttccatgtcggcagaatgcttaatgaattaca  
acagtaactgcatgagtgccagggcgggcgtaaACCGGTGGAGCCGGCTTACTAAAAGCCAGATAACAG  
TATGCGTATTTGCGCGCTGATTTTTGCGGTATAAGAATATATACTGATATGTATACCCGAAGTATGTCAA

AAAGAGGTATGCTATGAAGCAGCGTATTACAGTGACAGTTGACAGCGACAGCTATCAGTTGCTCAAGGCA  
TATATGATGTCAATATCTCCGGTCTGGTAAGCACAACCATGCAGAATGAAGCCCGTCGTCTGCGTGCCGA  
ACGCTGGAAAGCGGAAAATCAGGAAGGGATGGCTGAGGTCGCCCGTTTATTGAAATGAACGGCTCTTTT  
GCTGACGAGAACAGGGGCTGGTGAAATGTCAGTTTAAGGTTTACACCTATAAAAGAGAGAGCCGTTATCGT  
CTGTTTGTGGATGTACAGAGTGATATTATTGACACGCCCGGCCACGGATGGTGATCCCCCTGGCCAGTG  
CACGTCTGCTGTGAGATAAAGTCTCCCGTGAACCTTACC CGGTGGTGCATATCGGGGATGAAAGCTGGCG  
CATGATGACCACCGATATGGCCAGTGTGCCGGTTTCCGTTATCGGGGAAGAAGTGGCTGATCTCAGCCAC  
CGCGAAAATGACATCAAAAACGCCATTAACCTGATGTTCTGGGGAATATAAATGTCAGGCTCCCTTATAC  
ACAGCCAGTCTGCACCTCGACggtctcAtcgtggtatcttagaaaattattctaagtccaacatagcgta  
ttctaagttcaacatatcgacgaactagaaaagacattggacatattccaggatattgcaaaagaaaaca  
tgaatattgTTTTgaatgtgttcaagtaaatgagattttcaagtcgtctaaagaacagttgctaatacag  
ttacttatttcaataaataattggttctaataatacaaacatattcgaggatattgcaaaaaagatg  
tttgttattttgaaaagcttgagtagtttctctccgaggtgtagcgaagaagcatcatctactttgta  
gtaattttctttatgttttcaactttgtaattttatttggtaattgtaccatggccgatattcggtttat  
tgaagaaaatttatgttacttctgttttggcttgcacatgattatgctagttttcttataccctttcg  
taagcttcctaaggaatcgttcattgatttccactgcttcattgtatattaaaactttacaactgtatcg  
accatcatataattctgggtcaagagatgaaaatagaacaccacatcgtaaagtgaatAAGGGTGGGCG  
CGCCGACCAGCTTTCTTGTACAAAGTTGGCATTATAAGAAAGCATTGCTTATCAATTTGTTGCAACGAA  
CAGGTCACTATCAGTCAAAAATAAATCATTATTTGCCATCCAGCTGATATCCCTATAGTGAGTCGTATT  
ACATGGTCATAGCTGTTTCCCTGGCAGCTCTGGCCCGTGTCTCAAAATCTCTGATGTTACATTGCACAAGA  
TAAAAATATATCATCATGAACAATAAACTGTCTGCTTACATAAACAGTAATACAAGGGGTGTTatgagc  
catattcaacgggaaacgtcgaggccgcatataattccaacatggatgctgatttatatgggtataaat  
gggctcgcgataatgtcgggcaatcaggtgcgacaatctatcgcttgatgggaagcccgatgcgccaga  
gttgtttctgaaacatggcaaggtagcgttgccaatgatgttacagatgagatggctcagactaaactgg  
ctgacggaatttatgcctcttccgaccatcaagcattttatccgtactcctgatgatgcatggttactca  
ccactgcgatccccgaaaaacagcattccaggtattagaagaatatcctgattcaggtgaaaatattgt  
tgatgcgctggcagtgcttctcgcgccggttgcatcattcctggttgaattgtccttttaacagcgat  
cgcgtatttctgctcgcctcagggcgaatcacgaatgaataacggttgggtgatgcgagtgattttgatg  
acgagcgtaattggctggcctgttgaacaagtctggaagaaatgcataaacttttgccattctcaccgga  
ttcagtcgctcactcatggtgatttctcacttgataaccttatttttgacgaggggaaattaatagggtgt  
attgatgttgacgagtcggaatcgcagaccgataccaggatcttgccatcctatggaactgcctcgggtg  
agttttctccttcattacagaaacggctttttcaaaaatattggtattgataatcctgatattgaataaatt  
gcagtttcatttgatgctcgatgagttttcTAATCAGAATTGGTTAATTGGTTGTAACACTGGCAGAGC

ATTACGCTGACTTGACGGGACGGCGCAAGCTCATGACCAAAATCCCTTAACGTGAGTTACGCGTCGTTCC  
ACTGAGCGTCAGACCCCGTAGAAAAGATCAAAGGATCTTCTTGAGATCCTTTTTTCTGCGGTAATCTG  
CTGCTTGCAAACAAAAAACCCCGCTACCAGCGGTGGTTTGTGGCCGGATCAAGAGCTACCAACTCTT  
TTTCCGAAGGTAACCTGGCTTCAGCAGAGCGCAGATACCAAATACTGTCCTTCTAGTGTAGCCGTAGTTAG  
GCCACCACTTCAAGAACTCTGTAGCACCGCCTACATACCTCGCTCTGCTAATCCTGTTACCAGTGGCTGC  
TGCCAGTGGCGATAAGTCGTGTCTTACCGGGTTGGACTCAAGACGATAGTTACCGGATAAGGCGCAGCGG  
TCGGGCTGAACGGGGGGTTCGTGCACACAGCCCAGCTTGGAGCGAACGACCTACACCGAACTGAGATACC  
TACAGCGTGAGCATTGAGAAAGCGCCACGCTTCCCGAAGGGAGAAAGGCGGACAGGTATCCGGTAAGCGG  
CAGGGTCGGAACAGGAGAGCGCACGAGGGAGCTTCCAGGGGAAACGCCTGGTATCTTTATAGTCCTGTC  
GGGTTTCGCCACCTCTGACTTGAGCGTCGATTTTTGTGATGCTCGTCAGGGGGCGGAGCCTATGGAAAA  
ACGCCAGCAACGCGGCCTTTTTACGGTTCCTGGCCTTTTGCTGGCCTTTTGCTCACATGTT

PURPLE/UPPERCASE: M13-F binding site

orange/lowercase: attL1

BLUE/UPPERCASE: *AtTAS1c* 5' region

RED/UPPERCASE: *BsaI* site

red/lowercase: inverted *BsaI* site

magenta/lowercase: Chloramphenicol resistance gene

MAGENTA/UPPERCASE: *ccdB* gene

blue/lowercase: *AtTAS1c* 3' region

orange/lowercase/underlined: attL2

PURPLE/UPPERCASE/UNDERLINED: M13-R binding site

brown/lowercase: Kanamycin resistance gene

**>pMDC32B-AtTAS1c-D2-B/c (12592 bp)**

CCAGCCAGCCAACAGCTCCCCGACCGGCAGCTCGGCACAAAATCACCACCTCGATACAGGCAGCCCATCAG  
TCCGGGACGGCGTCAGCGGGAGAGCCGTTGTAAGGCGGCAGACTTTGCTCATGTTACCGATGCTATTCGG  
AAGAACGGCAACTAAGCTGCCGGGTTTGAAACACGGATGATCTCGCGGAGGGTAGCATGTTGATTGTAAC  
GATGACAGAGCGTTGCTGCCTGTGATCACCGCGGTTTCAAAAATCGGCTCCGTCGATACTATGTTATACGC  
CAACTTTGAAAACAACCTTTGAAAAAGCTGTTTTCTGGTATTTAAGGTTTTAGAATGCAAGGAACAGTGAA  
TTGGAGTTCGTCTTGTATAATTAGCTTCTTGGGGTATCTTTAAATACTGTAGAAAAGAGGAAGGAAATA  
ATAAatggctaaaatgagaatatcaccggaattgaaaaaactgatcgaaaaataccgctgcgtaaaagat  
acggaaggaatgtctcctgctaaggtatataagctggtgggagaaaatgaaaacctatattttaaagatga  
cggacagccggtataaagggaccacctatgatgtggaacgggaaaaggacatgatgctatggctggaagg  
aaagctgcctgttccaaaggtcctgcactttgaacggcatgatggctggagcaatctgctcatgagtgag  
gccgatggcgtcctttgctcggaagagtatgaagatgaacaaagccctgaaaagattatcgagctgtatg  
cggagtgcacagggctctttcactccatcgacatatcggattgtccctatacgaatagcttagacagccg  
cttagccgaattggattacttactgaataacgatctggccgatgtggattgcgaaaactgggaagaagac  
actccatttaaagatccgcgcgagctgtatgattttttaaagacggaaaagcccgaagaggaacttgtct  
tttcccacggcgacctgggagacagcaacatctttgtgaaagatggcaaagtaagtggctttattgatct  
tgggagaagcggcagggcggacaagtggatgacattgccttctgcgtccggtcgatcagggaggatatac  
ggggaagaacagtatgtcgagctatttttggacttactggggatcaagcctgattgggagaaaataaaat  
attataattttactggatgaattgttttagTACCTAGAATGCATGACCAAAATCCCTTAACGTGAGTTTTTC  
GTTCCACTGAGCGTCAGACCCCGTAGAAAAGATCAAAGGATCTTCTTGAGATCCTTTTTTTCTGCGCGTA  
ATCTGCTGCTTGCAAACAAAAAACCACCGCTACCAGCGGTGGTTTGTGTTGCCGGATCAAGAGCTACCAA  
CTCTTTTTCCGAAGGTAACCTGGCTTCAGCAGAGCGCAGATACCAAATACTGTCCTTCTAGTGTAGCCGTA  
GTTAGGCCACCACCTCAAGAACTCTGTAGCACCGCCTACATACCTCGCTCTGCTAATCCTGTTACCAGTG  
GCTGCTGCCAGTGCGGATAAGTCGTGTCTTACCGGGTTGGACTCAAGACGATAGTTACCGGATAAGGCGC  
AGCGGTCCGGCTGAACGGGGGTTTCGTGCACACAGCCCAGCTTGGAGCGAACGACCTACACCGAACTGAG  
ATACCTACAGCGTGAGCTATGAGAAAAGCGCCACGCTTCCCGAAGGGAGAAAAGGCGGACAGGTATCCGGTA  
AGCGGCAGGGTCGGAACAGGAGAGCGCACGAGGGAGCTTCCAGGGGAAACGCCTGGTATCTTTATAGTC  
CTGTCCGGTTTCGCCACCTCTGACTTGAGCGTCGATTTTTGTGATGCTCGTCAGGGGGGCGGAGCCTATG  
GAAAAACGCCAGCAACCGGGCTTTTTACGGTTCTTGGCCTTTTGCTGGCCTTTTGCTCACATGTTCTTT  
CCTGCGTTATCCCCTGATTCTGTGGATAACCGTATTACCGCCTTTGAGTGAGCTGATACCGCTCGCCGCA  
GCCGAACGACCGAGCGCAGCGAGTCAGTGAGCGAGGAAGCGGAAGAGCGCCTGATGCGGTATTTCTCCT  
TACGCATCTGTGCGGTATTTACACCCGCATATGGTGCCTCTCAGTACAATCTGCTCTGATGCCGCATAG  
TTAAGCCAGTATACACTCCGCTATCGCTACGTGACTGGGTGATGGCTGCGCCCCGACACCCGCCAACACC

CGCTGACGCGCCCTGACGGGCTTGTCTGCTCCCGGCATCCGCTTACAGACAAGCTGTGACCGTCTCCGGG  
AGCTGCATGTGTCAGAGGTTTTACCCGTATCACCGAAACGCGCGAGGCAGGGTGCCCTTGATGTGGGCGC  
CGGCGGTTCGAGTGGCGACGGCGGGCTTGTCCGCGCCCTGGTAGATTGCCTGGCCGTAGGCCAGCCATTT  
TTGAGCGGCCAGCGGCCGCGATAGGCCGACGCGAAGCGGCGGGGCGTAGGGAGCGCAGCGACCGAAGGGT  
AGGCCTTTTTTGCAGCTCTTCGGCTGTGCGCTGGCCAGACAGTTATGCACAGGCCAGGCGGGTTTTAAGA  
GTTTTAATAAGTTTTAAAGAGTTTTAGGCGGAAAAATCGCCTTTTTTCTCTTTTATATCAGTCACTTACA  
TGTGTGACCGGTTCCCAATGTACGGCTTTGGGTTCCCAATGTACGGGTTCCGGTTCCCAATGTACGGCTT  
TGGGTTCCCAATGTACGTGCTATCCACAGGAAAGAGA▲CTTTTCGACCTTTTTCCCCTGCTAGGGCAATT  
TGCCCTAGCATCTGCTCCGTACATTAGGAACCGGCGGATGCTTCGCCCTCGATCAGGTTGCGGTAGCGCA  
TGACTAGGATCGGGCCAGCCTGCCCCGCTCCTCCTTCAAATCGTACTCCGGCAGGTCATTTGACCCGAT  
CAGCTTGCACACGGTGAAACAGAACTTCTTGAACCTCTCCGGCGCTGCCACTGCGTTTCGTAGATCGTCTTG  
AACAAACCATCTGGCTTCTGCCTTGCTTGCGGCGGGCGTGCAGGCGGTAGAGAAAACGGCCGATGCCGG  
GATCGATCAAAAAGTAATCGGGGTGAACCGTCAGCACGTCCGGGTTCTTGCCTTCTGTGATCTCGCGGTA  
CATCCAATCAGCTAGCTCGATCTCGATGTACTCCGGCCGCCGGTTTTCGCTCTTTACGATCTTGTAGCGG  
CTAATCAAGGCTTACCCCTCGGATACCGTCACCAGGCGGCCGTTCTTGGCCTTCTTCGTACGCTGCATGG  
CAACGTGCGTGGTGTTTAACCGAATGCAGGTTTCTACCAGGTCGTCTTTCTGCTTTCCGCCATCGGCTCG  
CCGGCAGAACTTGAGTACGTCCGCAACGTGTGGACGGAACACGCGGCCGGGCTTGTCTCCCTTCCCTTCC  
CGGTATCGGTTTCATGGATTTCGGTTAGATGGGAAACCGCCATCAGTACCAGGTCGTAATCCCACACACTGG  
CCATGCCGGCCGGCCCTGCGGAAACCTCTACGTGCCCGTCTGGAAGCTCGTAGCGGATCACCTCGCCAGC  
TCGTCCGGTCACGCTTCGACAGACGGGAAACGGCCACGTCCATGATGCTGCGACTATCGCGGGTGCCACG  
TCATAGAGCATCGGAACGAAAAAATCTGGTTGCTCGTCGCCCTTGGGCGGCTTCCTAATCGACGGCGCAC  
CGGCTGCCGGCGGTTGCCGGGATTCTTTGCGGATTCGATCAGCGGCCGCTTGCCACGATTCACCGGGGCG  
TGCTTCTGCCTCGATGCGTTGCCGCTGGGCGGCCCTGCGCGGCCCTTCAAACCTTCTCCACCAGGTCATACCC  
AGCGCCGCGCCGATTTGTACCGGGCCGGATGGTTTGCACCGTCACGCCGATTCCTCGGGCTTGGGGGTT  
CCAGTGCCATTGCAGGGCCGGCAGACAACCCAGCCGCTTACGCCCTGGCCAACCGCCCGTTCTCCACACA  
TGGGGCATTCCACGGCGTCGGTGCCTGGTTGTTCTTGATTTTCCATGCCGCCTCCTTTAGCCGCTAAAAAT  
TCATCTACTCATTTATTCATTTGCTCATTTACTCTGGTAGCTGCGCGATGTATTAGATAGCAGCTCGGT  
AATGGTCTTGCCCTGGCGTACCGGTACATCTTACGCTTGGTGTGATCCTCCGCCGGCAACTGAAAGTTG  
ACCCGCTTCATGGCTGGCGTGTCTGCCAGGCTGGCCAACGTTGCAGCCTTGCTGCTGCGTGCCTCGGAC  
GGCCGGCACTTAGCGTGTGTTGTGCTTTTGTCTCATTTTCTCTTTACCTCATTAACCTCAAATGAGTTTTGAT  
TTAATTTAGCGGCCAGCGCCTGGACCTCGCGGGCAGCGTCGCCCTCGGGTTCTGATTCAGAACGGTTG  
TGCCGGCGGGCAGTGCCTGGGTAGCTCACGCGCTGCGTGATACGGGACTCAAGAATGGGCAGCTCGTA  
CCCAGCCAGCGCCTCGGCAACCTCACCGCCGATGCGCGTGCCTTTGATCGCCCGGACACGACAAAAGGCC

GCTTGTAGCCTTCCATCCGTGACCTCAATGCGCTGCTTAACCAGCTCCACCAGGTCGGCGGTGGCCCATA  
TGTCGTAAGGGCTTGGCTGCACCGGAATCAGCACGAAGTCGGCTGCCTTGATCGCGGACACAGCCAAGTC  
CGCCGCCTGGGGCGCTCCGTGATCACTACGAAGTCGCGCCGGCCGATGGCCTTACAGTCGCGGTCAATC  
GTCGGGCGGTGATGCCGACAACGGTTAGCGGTTGATCTTCCCGCACGGCCGCCAATCGCGGGCACTGC  
CCTGGGGATCGGAATCGACTAACAGAACATCGGCCCGGGCAGTTGCAGGGCGCGGGCTAGATGGGTTGC  
GATGGTCGTCTTGCCGTGACCCGCCCTTCTGGTTAAGTACAGCGATAACCTTCATGCGTTCCCTTGCGTA  
TTTGTATTACTCATCGCATCATATACGCAGCGACCGCATGACGCAAGCTGTTTTACTCAAATACACA  
TCACCTTTTTTAGACGGCGCGCTCGGTTTCTTCAGCGCCAAGCTGGCCGGCCAGGCCGCGCAGCTTGCA  
TCAGACAAACCGCCAGGATTCATGCAGCCGCACGGTTGAGACGTGCGCGGGCGGCTCGAACACGTACC  
CGGCCGCGATCATCTCCGCCTCGATCTCTTCGGTAATGAAAAACGGTTTCGTCTGGCCGTCTGGTGCGG  
TTTTATGCTTGTTCCTCTTGGCGTTCATCTCGGGCGCCGCCAGGGCGTTCGGCCTCGGTCAATGCGTCT  
CACGGAAGGCACCGCGCCGCTGGCCTCGGTGGGCGTCACTTCCCTCGCTGCGCTCAAGTGCAGCGGTACAG  
GGTCGAGCGATGCACGCCAAGCAGTGCAGCCGCCTCTTTCACGGTGCAGCCCTTCCCTGGTCGATCAGCTCG  
CGGGCGTGCAGCGATCTGTGCCGGGGTGGGGTAGGGCGGGGGCCAAACTTCACGCCTCGGGCCTTGGCGG  
CCTCGCGCCCGCTCCGGGTGCGGTGATGATTAGGGAACGCTCGAACTCGGCAATGCCGGCGAACACGGT  
CAACACCATGCGGCCGGCCGGCGTGGTGGTGTGGCCACGGCTCTGCCAGGCTACGCAGGCCCGCGCCG  
GCCTCTGGATGCGCTCGGCAATGTCCAGTAGGTGCGGGGTGCTGCGGGCCAGGCGGTCTAGCCTGGTCA  
CTGTCAACAACGTCGCCAGGGCGTAGGTGGTCAAGCATCTTGGCCAGCTCCGGGCGGTGCGCCTGGTGCC  
GGTGATCTTCTCGAAAAACAGCTTGGTGCAGCCGGCCGCGTGCAGTTCGGCCCGTTGGTTGGTCAAGTCC  
TGGTCGTGCGGTGCTGACGCGGGCATAGCCAGCAGGCCAGCGGGCGGCGCTCTTGTTCATGGCGTAATGTC  
TCCGGTTCTAGTCGCAAGTATTCTACTTTATGCGACTAAAACACGCGACAAGAAAACGCCAGGAAAAGGG  
CAGGGCGGCAGCCTGTGCGTAACTTAGGACTTGTGCGACATGTCGTTTTTCAGAAGACGGCTGCACTGAA  
CGTCAGAAGCCGACTGCACTATAGCAGCGGAGGGGTTGGATCAAAGTACTTTGATCCCGAGGGGAACCTT  
GTGGTTGGCATGCACATACAAAATGGACGAACGGATAAACCTTTTTCAGCCCTTTTAAATATCCGTTATTC  
TAATAAACGCTCTTTTCTCTTAGG**tttaccgccaatatatcctgtca**AACACTGATAGTTTAAACTGAA  
GGCGGGAAACGACAATCTGATCCAAGCTCAAGCTGCTCTAGCATTCGCCATTCAGGCTGCGCAACTGTTG  
GGAAGGGCGATCGGTGCGGGCCTCTTCGCTATTACGCCAGCTGGCGAAAGGGGGATGTGCTGCAAGGCGA  
TTAAGTTGGGTAACGCCAGGGTTTTCCAGTCACGACGTTGTAAAACGACGGCCAGTGCCAAGCTTGGCG  
TGCTGCA**GGTCAACATGGTGGAGCACGACACACTTGTCTACTCCAAAAATATCAAAGATACAGTCTCAG  
AAGACCAAAGGGCAATTGAGACTTTTCAACAAAGGGTAATATCCGAAACCTCCTCGGATTCCATTGCC  
AGCTATCTGTCACTTTATTTGTAAGATAGTGGAAAAGGAAGGTGGCTCCTACAAATGCCATCATTTGCGAT  
AAAGGAAAAGGCCATCGTTGAAGATGCCTCTGCCGACAGTGGTCCCAAAGATGGACCCCAACCCACGAGGA  
GCATCGTGAAAAAGAAGACGTTCCAACCACGTCTTCAAAGCAAGTGGATTGATGTGATAACATGGTGG**

GCACGACACACTTGTCTACTCCAAAAATATCAAAGATACAGTCTCAGAAGACCAAAGGGCAATTGAGACT  
TTTCAACAAAAGGTAATATCCGGAAACCTCCTCGGATTCCATTGCCAGCTATCTGTCACTTTATTGTGA  
AGATAGTGAAAAAGGAAGGTGGCTCCTACAAATGCCATCATTTGCGATAAAGGAAAGGCCATCGTTGAAGA  
TGCTCTGCCGACAGTGGTCCCAAAGATGGACCCCCACCCACGAGGAGCATCGTGAAAAAGAAGACGTT  
CCAACCACGTCTTCAAAGCAAGTGGATTGATGTGATATCTCCACTGACGTAAGGGATGACGCACAATCCC  
ACTATCCTTCGCAAGACCCTTCTCTATATAAGGAAGTTCATTTTCATTTGGAGAGGACCTCGACTCTAGA  
GGATCCCCGGGTACCGGGCCCCCTCGAGGCGCGCAAGCTATCAAACAAGTTTGTACAAAAAGCAGG  
CTCCGCGGCCGCCCTTCACCCCTTCACCAAACCTAAACCTAAACGGCTAAGCCCGACGTCAAATACCA  
AAAAGAGAAAAACAAGAGCGCCGTCAAGCTCTGAAATACGATCTGTAAGTCCATCTTAACACAAAAGTG  
AGATGGGTTCTTAGATCATGTTCCGCCGTTAGATCGAGTCATGGTCTTGTCTCATAGAAAGGTACTTTTCG  
TTTACTTCTTTTGAGTATCGAGTAGAGCGTCTATAGTTAGTTTGAGATTGCGTTTGTGAGAAGTTAG  
GTTCAATGTCCCGGTCCAATTTTCACCAGCCATGTGTGAGTTTCGTTCCCTCCCGTCTCTTTTGATT  
TCGTTGGGTTACGGATGTTTTCGAGATGAAACAGCATTGTTTTGTTGTGATTTTTCTCTACAAGCGAATA  
GACCATTTAAGAGACCATTAGGCACCCAGGCTTTACACTTTATGCTTCCGGCTCGTATAATGTGTGGAT  
TTTGAGTTAGGAGCCGTCGAGATTTTCAGGAGCTAAGGAAGCTAAAatggagaaaaaatcactggatat  
accaccgttgatataatcccaatggcatcgtaaagaacatthttgaggcatttcagtcagttgctcaatgta  
cctataaccagaccgttcagctggatattacggcctthtttaagaccgtaaagaaaaataagcacaagtt  
ttatccggcctthttacattcttgccgctgatgaatgctcatccggagttccgatggcaatgaaa  
gacggtgagctggtgatatgggatagtgttcaccctgttacaccgthttccatgagcaaaactgaaacgt  
thttcatcgctctggagtgaataaccacgacgattthccggcagthttctacacatatattcgcaagatgtggc  
gtgttacggtgaaaacctggcctatthccctaaaggtthttattgagaatagthtttcgtctcagccaat  
ccctgggtgagthttcaccagthttgatthaaacgtggccaatatggacaactthttcgccccgthttca  
ccatgggcaaatattatacgcaaggcgacaaggtgctgatgcccgtggcgattcaggttcatcatgccgt  
ttgtgatggcttccatgtcggcagaatgcttaatgaattacaacagtagctgagtgagtgaggggcggg  
gggtaaACGCGTGGAGCCGGCTTACTAAAAGCCAGATAACAGTATGCGTATTTGCGCGCTGATTTTTGCG  
GTATAAGAATATATACTGATATGTATACCCGAAGTATGTCAAAAAGAGGTATGCTATGAAGCAGCGTATT  
ACAGTGACAGTTGACAGCGACAGCTATCAGTTGCTCAAGGCATATATGATGTCAATATCTCCGGTCTGGT  
AAGCACAACCATGCAGAAATGAAGCCCGTCGTCTGCGTGCCGAACGCTGGAAAGCGGAAAATCAGGAAGGG  
ATGGCTGAGGTCGCCCCGTTTATTGAAAATGAACGGCTCTTTTGCTGACGAGAACAGGGGCTGGTGAAATG  
CAGTTTAAGTTTACACCTATAAAAGAGAGAGCCGTTATCGTCTGTTTGTGGATGTACAGAGTGATATTA  
TTGACACGCCCGCCGACGGATGGTGATCCCCCTGGCCAGTGACGCTCTGCTGTCAGATAAAGTCTCCCC  
TGAACTTTACCCGGTGGTGATATCGGGGATGAAAGCTGGCGCATGATGACCACCGATATGGCCAGTGTG  
CCGGTTTCCGTTATCGGGGAAGAAGTGGCTGATCTCAGCCACCGCGAAAATGACATCAAAAACGCCATTA

ACCTGATGTTCTGGGGAATATAATGTCAGGCTCCCTTATACACAGCCAGTCTGCACCTCGACggtctcA  
tcggtggatccttagaaaattattctaagtccaacatagcgtattctaagttcaacatcgcacgaactag  
aaaagacattggacatattccaggatgcaaaaagaaacaatgaatattgtttgaatgtttcaagta  
aatgagattttcaagtcgtctaaagaacagttgctaatacagttacttatttcaataaataattggttct  
aataatacaaaacatattcgaggatgcaagaaaaagatgtttgtattttgaaaagcttgagtagtt  
tctctccgaggtgtagcgaagaagcatcatctactttgtaatgtaattttctttatgtttctactttgta  
atthttattgtgtaatgtaccatggccgatcggttttattgaaagaaaatttatgttacttctgttt  
tggctttgcaatcagttatgctagttttcttataccctttcgttaagcttctaaggaatcgttcattgat  
ttccactgcttcattgtatattaaaactttacaactgtatcgaccatcatataattctgggtcaagagat  
gaaaatagaacaccacatcgtaaagtgaaatAAGGGTGGGCGCGCCGACCCAGCTTTCTTGTACAAAGTG  
GTTCGATAATTCCTTAATTAAC TAGTTCTAGAGCGGCCGCCACC GCGGTGGAGCTCGAATTTCCCGAT  
CGTTCAAACATTTGGCAATAAAGTTTCTTAAGATTGAATCCTGTTGCCGGTCTTGGCGATGATTATCATAT  
AATTTCTGTTGAATTACGTTAAGCATGTAATAATTAACATGTAATGCATGACGTTATTTATGAGATGGGT  
TTTTATGATTAGAGTCCCGCAATTATACATTTAATACGCGATAGAAAAACAAAATATAGCGCGCAAAC TAG  
GATAAATTATCGCGCGCGGTGCATCTATGTTACTGAATTCGTAATCATGGTCATAGCTGTTTCTGTGT  
GAAATTGTTATCCGCTCACAATTCACACAACATACGAGCCGGAAGCATAAAGTGTAAGCCTGGGGTGC  
CTAATGAGTGAGCTAACTCACATTAATTGCGTTGCGCTCACTGCCCGCTTTCAGTCGGGAAACCTGTGC  
TGCCAGCTGCATTAATGAATCGGCCAACGCGCGGGGAGAGGCGGTTTGCATATTGGCTAGAGCAGCTTGC  
CAACATGGTGGAGCACGACACTCTCGTCTACTCCAAGAATATCAAAGATACAGTCTCAGAAGACCAAAGG  
GCTATTGAGACTTTTCAACAAAAGGTAATATCGGGAAACCTCCTCGGATTCCATTGCCAGCTATCTGTC  
ACTTCATCAAAAGGACAGTAGAAAAGGAAGGTGGCACCTACAAATGCCATCATTGCGATAAAGGAAAGGC  
TATCGTTCAAGATGCCTCTGCCGACAGTGGTCCCAAAGATGGACCCCAACGAGGAGCATCGTGGAA  
AAAGAAGACGTTCCAACCACGCTTCAAAGCAAGTGGATTGATGTGATAACatggtggagcagcagactc  
tcgtctactccaagaatatcaaagatacagctctcagaagaccaaagggctattgagacttttcaacaag  
ggtaatatcgggaaacctcctcggattccattgcccagctatctgtcacttcatcaaaggacagtagaa  
aaggaaggtggcacctacaaatgccatcattgcgataaaggaaaggctatcgttcaagatgcctctgccg  
acagtggtcccaaagatggacccccaccacgaggagcatcgtgaaaaagaagacgttccaaccagctc  
ttcaaagcaagtgattgatgtgatctccactgacgtaagggatgacgcacaatcccactatccttcg  
caagaccttctctatataaggaagtccattttcatttggagaggACACGCTGAAATCACCAGTCTCTCTC  
TACAAATCTATCTCTCTCGAGCTTTCGCAGATCCCGGGGGCAATGAGATATGAAAAAGCCTGAACTCAC  
CGCGACGCTGTGCGAGAAGTTTCTGATCGAAAAGTTGACAGCGTCTCCGACCTGATGCAGCTCTCGGAG  
GGCGAAGAATCTCGTGCTTTCAGCTTCGATGTAGGAGGGCGTGGATATGTCCTGCGGGTAAATAGCTGCG  
CCGATGGTTTCTACAAAGATCGTTATGTTTATCGGCACCTTGCATCGGCCGCGCTCCCGATTCCGGAAGT



GCTTGACATTGGGGAGTTTAGCGAGAGCCTGACCTATTGCATCTCCCGCCGTGCACAGGGTGTACGTTG  
CAAGACCTGCCTGAAACCGAACTGCCCGCTGTTCTACAACCGGTGCGCGGAGGCTATGGATGCGATCGCTG  
CGGCCGATCTTAGCCAGACGAGCGGGTTCGGCCCATTCGGACC GCAAGGAATCGGTCAATACACTACATG  
GCGTGATTTTCATATGCGCGATTGCTGATCCCCATGTGTATCACTGGCAAAC TGTGATGGACGACACCGTC  
AGTGCCTCCGTCGCGCAGGCTCTCGATGAGCTGATGCTTTGGGCCGAGGACTGCCCCGAAGTCCGGCACC  
TCGTGCACGCGGATTTTCGGCTCCAACAATGTCCTGACGGACAATGGCCGCATAACAGCGGTCAATTGACTG  
GAGCGAGGCGATGTTTCGGGGATTCCCAATACGAGGTCGCCAACATCTTCTTCTGGAGGCCGTGGTTGGCT  
TGTATGGAGCAGCAGACGCGCTACTTCGAGCGGAGGCATCCGGAGCTTGCAGGATCGCCACGACTCCGGG  
CGTATATGCTCCGCATTGGTCTTGACCAACTCTATCAGAGCTTGGTTGACGGCAATTTTCGATGATGCAGC  
TTGGGCGCAGGGTCGATGCGACGCAATCGTCCGATCCGGAGCCGGGACTGTCGGGCGTACACAAATCGCC  
CGCAGAAGCGCGGCCGTCTGGACCGATGGCTGTGTAGAAGTACTCGCCGATAGTGGAAACCGACGCCCA  
GCACTCGTCCGAGGGCAAAGAAATAGAGTAGATGCCGACCGGATCTGTCGATCGACAAGCTCGAGtttct  
ccataataatgtgtgagtagttcccagataaggggaattagggttcctatagggtttcgctcatgtgttga  
gcataataaagaacccttagtatgtatgtttgtatgtttgtaaaatacttctatcaataaaatttctaattccta  
aaaccaaataccagtaactaaaatccagatcCCCCGAATTAATTCGGCGTTAATTCAGTACATTA AAAACG  
TCCGCAATGTGTTATTAAGTTGTCTAAGCGTCAATTTGTTTACACCACAATATATCTTGCCA

brown/lowercase: kanamycin resistance gene

CYAN/UPPERCASE/UNDERLINED: C->A transversion to block vector's BsaI site

cyan/lowercase: T-DNA right border

GREEN/UPPERCASE: 2x35S CaMV promoter

ORANGE/UPPERCASE: attB1

BLUE/UPPERCASE: *AtTAS1c* 5' region

RED/UPPERCASE: *BsaI* site

magenta/lowercase: chloramphenicol resistance gene

MAGENTA/UPPERCASE: *ccdB* gene

red/lowercase: inverted *BsaI* site

blue/lowercase: *AtTAS1c* 3' region

ORANGE/UPPERCASE/UNDERLINED: attB2

GREY/UPPERCASE/UNDERLINED: Nos terminator

green/lowercase: CaMV promoter

BROWN/UPPERCASE: hygromycin resistance gene

green/lowercase/underlined: CaMV terminator

CYAN/UPPERCASE: T-DNA left border

**>pMDC32B-AtTAS1c-D2-B/c-AtMIR173 (14339 bp)**

CCAGCCAGCCAACAGCTCCCCGACCGGCAGCTCGGCACAAAATCACCACCTCGATACAGGCAGCCCATCAG  
TCCGGGACGGCGTCAGCGGGAGAGCCGTTGTAAGGCGGCAGACTTTGCTCATGTTACCGATGCTATTCGG  
AAGAACGGCAACTAAGCTGCCGGGTTTGAAACACGGATGATCTCGCGGAGGGTAGCATGTTGATTGTAAC  
GATGACAGAGCGTTGCTGCCGTGATCACC GCGGTTTCAAATCGGCTCCGTCGATACTATGTTATACGC  
CAACTTTGAAAACAACCTTTGAAAAAGCTGTTTTCTGGTATTTAAGGTTTTAGAAATGCAAGGAACAGTGAA  
TTGGAGTTCGTCTTGTATAATTAGCTTCTTGGGGTATCTTTAAATACTGTAGAAAAGAGGAAGGAAATA  
ATAAatggctaaaatgagaatatcaccggaattgaaaaactgatcgaaaaataccgctgcgtaaaagat  
acggaaggaatgtctcctgctaaggtatataagctggtgggagaaaatgaaaacctatatttaaaatga  
cggacagccggtataaagggaccacctatgatgtggaacgggaaaaggacatgatgctatggctggaagg  
aaagctgcctgttccaaaggtcctgcactttgaacggcatgatggctggagcaatctgctcatgagtgag  
gccgatggcgctctttgctcggaagagtatgaagatgaacaaagccctgaaaagattatcgagctgtatg  
cggagtgcacagggctctttcactccatcgacatatcggattgtccctatacgaatagcttagacagccg  
cttagccgaattggattacttactgaataacgatctggccgatgtggattgcgaaaactgggaagaagac  
actccatttaagatccgcgcgagctgtatgatttttaagacggaaaagcccgaagaggaacttgtct  
tttcccacggcgacctgggagacagcaacatctttgtgaaagatggcaaagtaagtggctttattgatct  
tgggagaagcggcagggcggacaagtggatgacattgccttctgcgtccggtcgatcagggaggatatac  
ggggaagaacagtatgtcgagctattttttgacttactggggatcaagcctgattgggagaaaataaaat  
attataattttactggatgaattgttttagTACCTAGAATGCATGACCAAAATCCCTTAACGTGAGTTTTTC  
GTTCCACTGAGCGTCAGACCCCGTAGAAAAGATCAAAGGATCTTCTTGAGATCCTTTTTTTCTGCGCGTA  
ATCTGCTGCTTGCAAACAAAAAACCACCGCTACCAGCGGTGGTTTGTGTTGCCGGATCAAGAGCTACCAA  
CTCTTTTTCCGAAGGTAACCTGGCTTCAGCAGAGCGCAGATACCAAATACTGTCCTTCTAGTGTAGCCGTA  
GTTAGGCCACCACCTCAAGAACTCTGTAGCACCGCCTACATACCTCGCTCTGCTAATCCTGTTACCAGTG  
GCTGCTGCCAGTGCGGATAAGTCGTGTCTTACCGGGTTGGACTCAAGACGATAGTTACC GGATAAGGCGC  
AGCGGTCCGGCTGAACGGGGGTTTCGTGCACACAGCCCAGCTTGGAGCGAACGACCTACACCGAACTGAG  
ATACCTACAGCGTGAGCTATGAGAAAAGCGCCACGCTTCCCGAAGGGAGAAAGGCGGACAGGTATCCGGTA  
AGCGGCAGGGTCGGAACAGGAGAGCGCACGAGGGAGCTTCCAGGGGAAACGCCTGGTATCTTTATAGTC  
CTGTCCGGTTTCGCCACCTCTGACTTGAGCGTCGATTTTTGTGATGCTCGTCAGGGGGGCGGAGCCTATG  
GAAAAACGCCAGCAACCGGGCTTTTTACGGTTCTGGCCTTTTGCTGGCCTTTTGCTCACATGTTCTTT  
CCTGCGTTATCCCCTGATTCTGTGGATAACCGTATTACCGCCTTTGAGTGAGCTGATACCGCTCGCCGCA  
GCCGAACGACCGAGCGCAGCGAGTCAGTGAGCGAGGAAGCGGAAGAGCGCCTGATGCGGTATTTTCTCCT  
TACGCATCTGTGCGGTATTTACACCCGCATATGGTGCCTCTCAGTACAATCTGCTCTGATGCCGCATAG  
TTAAGCCAGTATACACTCCGCTATCGCTACGTGACTGGGTGATGGCTGCGCCCCGACACCCGCCAACACC

CGCTGACGCGCCCTGACGGGCTTGTCTGCTCCCGGCATCCGCTTACAGACAAGCTGTGACCGTCTCCGGG  
AGCTGCATGTGTCAGAGGTTTTACCCGTTCATCACCGAAACGCGCGAGGCAGGGTGCCCTTGATGTGGGCGC  
CGGCGGTTCGAGTGGCGACGGCGGGCTTGTCCGCGCCCTGGTAGATTGCCTGGCCGTAGGCCAGCCATTT  
TTGAGCGGCCAGCGGCCGCGATAGGCCGACGCGAAGCGGCGGGGCGTAGGGAGCGCAGCGACCGAAGGGT  
AGGCGCTTTTTTGCAGCTCTTCGGCTGTGCGCTGGCCAGACAGTTATGCACAGGCCAGGCGGGTTTTAAGA  
GTTTTAATAAGTTTTAAAGAGTTTTAGGCGGAAAAATCGCCTTTTTTCTCTTTTATATCAGTCACTTACA  
TGTGTGACCGGTTCCCAATGTACGGCTTTGGGTTCCCAATGTACGGGTTCCGGTTCCCAATGTACGGCTT  
TGGGTTCCCAATGTACGTGCTATCCACAGGAAAGAGA▲CTTTTCGACCTTTTTCCCCTGCTAGGGCAATT  
TGCCCTAGCATCTGCTCCGTACATTAGGAACCGGCGGATGCTTCGCCCTCGATCAGGTTGCGGTAGCGCA  
TGACTAGGATCGGGCCAGCCTGCCCCGCTCCTCCTTCAAATCGTACTCCGGCAGGTCATTTGACCCGAT  
CAGCTTGCACACGGTGAAACAGAACTTCTTGAACCTCTCCGGCGCTGCCACTGCGTTTCGTAGATCGTCTTG  
AACAAACCATCTGGCTTCTGCCTTGCTTGCGGCGGGCGTGCAGGCGGTAGAGAAAACGGCCGATGCCGG  
GATCGATCAAAAAGTAATCGGGGTGAACCGTCAGCACGTCCGGGTTCTTGCCTTCTGTGATCTCGCGGTA  
CATCCAATCAGCTAGCTCGATCTCGATGTACTCCGGCCGCCGGTTTTCGCTCTTTACGATCTTGTAGCGG  
CTAATCAAGGCTTCACCCTCGATACCGTCACCAGGCGGCCGTTCTTGGCCTTCTTCGTACGCTGCATGG  
CAACGTGCGTGGTGTTTAACCGAATGCAGGTTTCTACCAGGTCGTCTTTCTGCTTTCCGCCATCGGCTCG  
CCGGCAGAACTTGAGTACGTCCGCAACGTGTGGACGGAACACGCGGCCGGGCTTGTCTCCCTTCCCTTCC  
CGGTATCGGTTTCATGGATTTCGGTTAGATGGGAAACCGCCATCAGTACCAGGTCGTAATCCCACACACTGG  
CCATGCCGGCCGGCCCTGCGGAAACCTCTACGTGCCCGTCTGGAAGCTCGTAGCGGATCACCTCGCCAGC  
TCGTCCGGTCACGCTTCGACAGACGGGAAACGGCCACGTCCATGATGCTGCGACTATCGCGGGTGCCACG  
TCATAGAGCATCGGAACGAAAAAATCTGGTTGCTCGTCGCCCTTGGGCGGCTTCCTAATCGACGGCGCAC  
CGGCTGCCGGCGGTTGCCGGGATTCTTTGCGGATTCGATCAGCGGCCGCTTGCCACGATTCACCGGGGCG  
TGCTTCTGCCTCGATGCGTTGCCGCTGGGCGGCCCTGCGCGGCCCTTCAAACCTTCTCCACCAGGTCATACCC  
AGCGCCGCGCCGATTTGTACCGGGCCGGATGGTTTGCACCGTCACGCCGATTCCTCGGGCTTGGGGGTT  
CCAGTGCCATTGCAGGGCCGGCAGACAACCCAGCCGCTTACGCCCTGGCCAACCGCCGTTCTCCACACA  
TGGGGCATTCCACGGCGTCGGTGCCTGGTTGTTCTTGATTTTCCATGCCGCCTCCTTTAGCCGCTAAAAAT  
TCATCTACTCATTTATTCATTTGCTCATTTACTCTGGTAGCTGCGCGATGTATTAGATAGCAGCTCGGT  
AATGGTCTTGCCTTGGCGTACCGGTACATCTTCAGCTTGGTGTGATCCTCCGCCGGCAACTGAAAGTTG  
ACCCGCTTCATGGCTGGCGTGTCTGCCAGGCTGGCCAACGTTGCAGCCTTGCTGCTGCGTGCCTCGGAC  
GGCCGGCACTTAGCGTGTGTTGTGCTTTTGTCTCATTTTCTCTTTACCTCATTAACCTCAAATGAGTTTTGAT  
TTAATTTAGCGGCCAGCGCCTGGACCTCGCGGGCAGCGTCGCCCTCGGGTTCTGATTCAGAACGGTTG  
TGCCGGCGGGCAGTGCCTGGGTAGCTCACGCGCTGCGTGATACGGGACTCAAGAATGGGCAGCTCGTA  
CCCAGCCAGCGCCTCGGCAACCTCACCGCCGATGCGCGTGCCTTTGATCGCCCGGACACGACAAAAGGCC

GCTTGTAGCCTTCCATCCGTGACCTCAATGCGCTGCTTAACCAGCTCCACCAGGTCGGCGGTGGCCATA  
TGTCGTAAGGGCTTGGCTGCACCGGAATCAGCACGAAGTCGGCTGCCTTGATCGCGGACACAGCCAAGTC  
CGCCGCCTGGGGCGCTCCGTGATCACTACGAAGTCGCGCCGGCCGATGGCCTTCACGTCGCGGTCAATC  
GTCGGGCGGTGATGCCGACAACGGTTAGCGGTTGATCTTCCCGCACGGCCGCCAATCGCGGGCACTGC  
CCTGGGGATCGGAATCGACTAACAGAACATCGGCCCGGGCAGTTGCAGGGCGCGGGCTAGATGGGTTGC  
GATGGTCGTCTTGCCGTGACCCGCCCTTCTGGTTAAGTACAGCGATAACCTTCATGCGTTCCCTTGCGTA  
TTTGTTTATTTACTCATCGCATCATATACGCAGCGACCGCATGACGCAAGCTGTTTTACTCAAATACACA  
TCACCTTTTTTAGACGGCGCGCTCGGTTTCTTCAGCGCCAAGCTGGCCGGCCAGGCCGCCAGCTTGGA  
TCAGACAAACCGCCAGGATTCATGCAGCCGCACGGTTGAGACGTGCGCGGGCGGCTCGAACACGTACC  
CGGCCGCGATCATCTCCGCCTCGATCTCTTCGGTAATGAAAAACGGTTTCGTCTGGCCGTCTGGTGCGG  
TTTTATGCTTGTTCCCTCTTGGCGTTCATCTCGGGCGCCGCCAGGGCGTTCGGCCTCGGTCAATGCGTCT  
CACGGAAGGCACCGCGCCGCTGGCCTCGGTGGGCGTCACTTCCCTCGCTGCGCTCAAGTGCAGCGGTACAG  
GGTCGAGCGATGCACGCCAAGCAGTGCAGCCGCCTCTTTCACGGTGCAGCCCTTCCCTGGTCGATCAGCTCG  
CGGGCGTGCGGATCTGTGCCGGGGTGAGGGTAGGGCGGGGGCCAAACTTCACGCCTCGGGCCTTGGCGG  
CCTCGCGCCCGCTCCGGGTGCGGTGATGATTAGGGAACGCTCGAACTCGGCAATGCCGGCGAACACGGT  
CAACACCATGCGGCCGGCCGGCGTGGTGGTGTGGCCACGGCTCTGCCAGGCTACGCAGGCCCGCGCCG  
GCCTCTGGATGCGCTCGGCAATGTCCAGTAGGTGCGGGGTGCTGCGGGCCAGGCGGTCTAGCCTGGTCA  
CTGTCAACAACGTCGCCAGGGCGTAGGTGGTCAAGCATCTTGCCAGCTCCGGGCGGTGCGCCTGGTGCC  
GGTGATCTTCTCGAAAAACAGCTTGGTGCAGCCGGCCGCGTGCAGTTCGGCCCGTTGGTTGGTCAAGTCC  
TGGTCGTGCGGTGCTGACGCGGGCATAGCCAGCAGGCCAGCGGGCGGCGCTCTTGTTCATGGCGTAATGTC  
TCCGGTTCTAGTCGCAAGTATTCTACTTTATGCGACTAAAACACGCGACAAGAAAACGCCAGGAAAAGGG  
CAGGGCGGCAGCCTGTGCGTAACTTAGGACTTGTGCGACATGTCGTTTTTCAGAAGACGGCTGCACTGAA  
CGTCAGAAGCCGACTGCACTATAGCAGCGGAGGGGTTGGATCAAAGTACTTTGATCCCGAGGGGAACCCT  
GTGGTTGGCATGCACATACAAAATGGACGAACGGATAAACCTTTTCACGCCCTTTTAAATATCCGTTATTC  
TAATAAACGCTCTTTTCTCTTAGG**tttaccgccaatatatcctgtca**AACACTGATAGTTTAAACTGAA  
GGCGGGAAACGACAATCTGATCCAAGCTCAAGCTGCTCTAGCATTCGCCATTCAGGCTGCGCAACTGTTG  
GGAAGGGCGATCGGTGCGGGCCTCTTCGCTATTACGCCAGCTGGCGAAAGGGGGATGTGCTGCAAGGCGA  
TTAAGTTGGGTAACGCCAGGGTTTTCCAGTCACGACGTTGTAAAACGACGGCCAGTGCCAAGCTTGGCG  
TGCTGCA**GGTCAACATGGTGGAGCACGACACACTTGTCTACTCCAAAAATATCAAAGATACAGTCTCAG  
AAGACCAAAGGGCAATTGAGACTTTTCAACAAAGGGTAATATCCGAAACCTCCTCGGATTCCATTGCC  
AGCTATCTGTCACTTTATTTGTAAGATAGTGGAAAAGGAAGGTGGCTCCTACAAATGCCATCATTTGGAT  
AAAGGAAAAGGCCATCGTTGAAGATGCCTCTGCCGACAGTGGTCCCAAAGATGGACCCCAACCCACGAGGA  
GCATCGTGAAAAAGAAGACGTTCCAACCACGTCTTCAAAGCAAGTGGATTGATGTGATAACATGGTGG**

GCACGACACACTTGTCTACTCCAAAAATATCAAAGATACAGTCTCAGAAGACCAAAGGGCAATTGAGACT  
TTTCAACAAAAGGTAATATCCGGAAACCTCCTCGGATTCCATTGCCAGCTATCTGTCACTTTATTGTGA  
AGATAGTGAAAAAGGAAGGTGGCTCCTACAAATGCCATCATTTGCGATAAAGGAAAGGCCATCGTTGAAGA  
TGCTCTGCCGACAGTGGTCCCAAAGATGGACCCCCACCCACGAGGAGCATCGTGAAAAAGAAGACGTT  
CCAACCACGTCTTCAAAGCAAGTGGATTGATGTGATATCTCCACTGACGTAAGGGATGACGCACAATCCC  
ACTATCCTTCGCAAGACCCTTCTCTATATAAGGAAGTTCATTTTCATTTGGAGAGGACCTCGACTCTAGA  
GGATCCCCGGGTACCGGGCCCCCTCGAGGCGCGCAAGCTATCAAACAAGTTTGTACAAAAAGCAGG  
CTCCGCGGCCGCCCTTCACCCCTTCACCAAACCTAAACCTAAACGGCTAAGCCCGACGTCAAATACCA  
AAAAGAGAAAAACAAGAGCGCCGTCAAGCTCTGAAATACGATCTGTAAGTCCATCTTAACACAAAAGTG  
AGATGGGTTCTTAGATCATGTTCCGCCGTTAGATCGAGTCATGGTCTTGTCTCATAGAAAGGTACTTTTCG  
TTTACTTCTTTTGTAGTATCGAGTAGAGCGTCTGCTATAGTTAGTTTGTAGATTGCGTTTGTGAGAAGTTAG  
GTTCAATGTCCCGGTCCAATTTTCACCAGCCATGTGTGAGTTTCGTTCCCTTCCCGTCTCTTCTTTGATT  
TCGTTGGGTTACGGATGTTTTCGAGATGAAACAGCATTGTTTTGTTGTGATTTTTCTCTACAAGCGAATA  
GACCATTTAAGAGACCATTAGGCACCCAGGCTTTACACTTTATGCTTCCGGCTCGTATAATGTGTGGAT  
TTTGAGTTAGGAGCCGTCGAGATTTTCAGGAGCTAAGGAAGCTAAAatggagaaaaaatcactggatat  
accaccgttgatataatcccaatggcatcgtaaagaacatthttgaggcatttcagtcagttgctcaatgta  
cctataaccagaccgttcagctggatattacggcctthtttaagaccgtaaagaaaaataagcacaagtt  
ttatccggcctthttacattcttgccgctgatgaatgctcatccggagttccgatggcaatgaaa  
gacggtgagctggtgatatgggatagtggtcaccctggttacaccgthttccatgagcaaaactgaaacgt  
thttcatcgctctggagtgaataaccacgacgattthccggcagthttctacacatatattcgcaagatgtggc  
gtgttacggtgaaaacctggtcctatthccctaaaggtthttattgagaatagthtttctcagccaat  
ccctgggtgagthttcaccagthttgattthaaacgtggccaatatggacaactthttcgccccgthttca  
ccatgggcaaatattatacgcaaggcgacaaggtgctgatgcccgtggcgattcaggttcatcatgcccgt  
ttgtgatggcttccatgtcggcagaatgcttaatgaattacaacagtagctgagtgagtgaggggcggg  
gggtaaACGCGTGGAGCCGGCTTACTAAAAGCCAGATAACAGTATGCGTATTTGCGCGCTGATTTTTGCG  
GTATAAGAATATATACTGATATGTATACCCGAAGTATGTCAAAAAGAGGTATGCTATGAAGCAGCGTATT  
ACAGTGACAGTTGACAGCGACAGCTATCAGTTGCTCAAGGCATATATGATGTCAATATCTCCGGTCTGGT  
AAGCACAACCATGCAGAAATGAAGCCCGTCGTCTGCGTGCCGAACGCTGGAAAGCGGAAAATCAGGAAGGG  
ATGGCTGAGGTCGCCCCGTTTATTGAAAATGAACGGCTCTTTTGCTGACGAGAACAGGGGCTGGTGAAATG  
CAGTTTAAGTTTACACCTATAAAAGAGAGAGCCGTTATCGTCTGTTTGTGGATGTACAGAGTGATATTA  
TTGACACGCCCGCCGACGGATGGTGATCCCCCTGGCCAGTGACGCTCTGCTGTCAGATAAAGTCTCCCCG  
TGAACTTTACCCGGTGGTGATATCGGGGATGAAAGCTGGCGCATGATGACCACCGATATGGCCAGTGTG  
CCGGTTTCCGTTATCGGGGAAGAAGTGGCTGATCTCAGCCACCGCGAAAATGACATCAAAAACGCCATTA

ACCTGATGTTCTGGGGAATATAATGTCAGGCTCCCTTATACACAGCCAGTCTGCACCTCGACggctcA  
tcggtggatccttagaaaattattctaagtccaacatagcgtattctaagttcaacatatcgacgaactag  
aaaagacattggacatattccaggatgcaaaaagaaacaatgaatattgtttgaatgtttcaagta  
aatgagatcttcaagtcgtctaaagaacagttgctaatacagttacttatttcaataaataattggttct  
aataatacaaaaacatattcgaggatgcaagaaaaaagatgtttgtattttgaaaagcttgagtagtt  
tctctccgaggtgtagcgaagaagcatcatctactttgtaatgtaattttctttatgttttcactttgta  
atcttatttggttaatgtaccatggccgatcggttttattgaaagaaaattttagttacttctgttt  
tggctttgcaatcagttatgctagttttcttataccctttcgttaagcttccctaaggaatcgttcattgat  
ttccactgcttcattgtatattaaaactttacaactgtatcgaccatcatataattctgggtcaagagat  
gaaaatagaacaccacatcgtaaagtgaaatAAGGGTGGGCGCGCCGACCCAGCTTTCTTGTACAAAGTG  
GTTCGATAATTCCTTAATTAAC TAGTTCTAGAGCGGCCGCCACCGCGGTGGAGCTCGAATTTCCCGAT  
CGTTCAAACATTTGGCAATAAAGTTTCTTAAGATTGAATCCTGTTGCCGGTCTTGGCGATGATTATCATAT  
AATTTCTGTTGAATTACGTTAAGCATGTAATAATTAACATGTAATGCATGACGTTATTTATGAGATGGGT  
TTTTATGATTAGAGTCCCGCAATTATACATTTAATACGCGATAGAAAAACAAAATATAGCGCGCAAAC TAG  
GATAAATTATCGCGCGCGGTGTCATCTATGTTACTGAATTCaagcttggcgtgcctgcaGGTCAACATGG  
TGGAGCACGACACACTTGTCTACTCCAAAAATATCAAAGATACAGTCTCAGAAGACCAAAGGGCAATTGA  
GACTTTTCAACAAAGGGTAATATCCGGAAACCTCCTCGGATTCCATTGCCAGCTATCTGTCACTTTATT  
GTGAAGATAGTGAAAAGGAAGGTGGCTCCTACAAATGCCATCATTGCGATAAAGGAAAGGCCATCGTTG  
AAGATGCCTCTGCCGACAGTGGTCCCAAAGATGGACCCCCACCCACGAGGAGCATCGTGAAAAAGAAGA  
CGTTCCAACCACGTCTTCAAAGCAAGTGGATTGATGTGATAACATGGTGGAGCACGACACACTTGTCTAC  
TCCAAAAATATCAAAGATACAGTCTCAGAAGACCAAAGGGCAATTGAGACTTTTCAACAAAGGGTAATAT  
CCGGAAACCTCCTCGGATTCCATTGCCAGCTATCTGTCACTTTATTGTGAAGATAGTGAAAAGGAAGG  
TGGCTCCTACAAATGCCATCATTGCGATAAAGGAAAGGCCATCGTTGAAGATGCCTCTGCCGACAGTGGT  
CCCAAAGATGGACCCCCACCCACGAGGAGCATCGTGAAAAAGAAGACGTTCCAACCACGTCTTCAAAGC  
AAGTGGATTGATGTGATATCTCCACTGACGTAAGGGATGACGCACAATCCCACTATCCTTCGCAAGACCC  
TTCTCTATATAAGGAAGTTCATTTTCATTTGGAGAGGacctcgactctagaggatccccgggtaccgggc  
ccccctcgagggcgcgccaagctatcaacaagtgtgtacaaaaagcaggctccgcgccgcccggcttc  
accataattagcaagtaataaggaataaaaatcctgtaattatagctgaaaaaggaaaaatatttggagtc  
cgtcagattcgaatctgaacaaagcataaaaaagtcaacaaaacttaagcggcgactcatcgtaatct  
cagcccaataccctattttcctctcccctatataaataactttcttcttctactgatcttcttctcacaaa  
taaaccnaatatatcaatctactgtgttggtgattaagtaactttcgcttgagagagaaatcacagtgg  
tcaaaaaagttgtagttttcttaagctctcttctctgtgattctctgtgtaagcgaagagcttgctc  
cctaaacttatctctctgatgatttaatgtagagatcttcgtaaatctatgtgtttgatagatctgatg

cgttttttgagttgatgatttgattatTTTTTcactggaaagtatctcattagggtaacgataatgtttta  
tggatttggttgtataacagataaaggtggcgcgccgaccagctttcttgtacaaagtggttcgataa  
ttccttaattaactagttctagagcggccgcccaccgcggtggagctcGAATTTCCCCGATCGTTCAAAC  
ATTTGGCAATAAAGTTTCTTAAGATTGAATCCTGTTGCCGGTCTTGCATGATTATCATATAATTTCTGT  
TGAATTACGTTAAGCATGTAATAATTAACATGTAATGCATGACGTTATTTATGAGATGGGTTTTTATGAT  
TAGAGTCCCGCAATTATACATTTAATACGCGATAGAAAACAAAAATATAGCGCGCAAACCTAGGATAAATTA  
TCGCGCGCGGTGTCATCTATGTTactgaattcgaattcGTAATCATGGTCATAGCTGTTTCTGTGTGAA  
ATTGTTATCCGCTCACAAATCCACACAACATACGAGCCGGAAGCATAAAGTGTAAGCCTGGGGTGCCTA  
ATGAGTGAGCTAACTCACATTAATTGCGTTGCGCTCACTGCCCGCTTCCAGTCGGGAAACCTGTCGTGC  
CAGCTGCATTAATGAATCGGCCAACGCGCGGGGAGAGGCGGTTTGCATATTGGCTAGAGCAGCTTGCCAA  
CATGGTGGAGCACGACTCTCGTCTACTCCAAGAATATCAAAGATACAGTCTCAGAAGACCAAAGGGCT  
ATTGAGACTTTTCAACAAAGGGTAATATCGGGAAACCTCCTCGGATTCATTGCCAGCTATCTGTCACT  
TCATCAAAAAGGACAGTAGAAAAGGAAGGTGGCACCTACAAATGCCATCATTGCGATAAAGGAAAGGCTAT  
CGTTCAAGATGCCTCTGCCGACAGTGGTCCCAAAGATGGACCCCAACCCAGGAGCATCGTGGAAAAA  
GAAGACGTTCCAACCACGTTCTCAAAGCAAGTGGATTGATGTGATAACatggtggagcagcactctcg  
tctactccaagaatatcaaagatacagtctcagaagaccaagggtattgagacttttcaacaaaggt  
aatatcgggaaacctcctcggattccattgcccagctatctgtcacttcatcaaaggacagtagaaaag  
gaaggtggcaacctacaaatgccatcattgcgataaaggaaaggctatcgttcaagatgcctctgccgaca  
gtggtcccaaagatggacccccaccacgaggagcatcgtggaaaaagaagacgttccaaccacgtcttc  
aaagcaagtggattgatgtgatatctccactgacgtaagggatgacgcacaatcccactatccttcgcaa  
gaccttctctatataaggaagttcatttcatttggagaggACACGCTGAAATCACCAGTCTCTCTCTAC  
AAATCTATCTCTCTCGAGCTTTCGCAGATCCCGGGGGCAATGAGATATGAAAAGCCTGAACTCACCGC  
GACGCTCTGTCGAGAAGTTTCTGATCGAAAAGTTCGACAGCGTCTCCGACCTGATGCAGCTCTCGGAGGGC  
GAAGAATCTCGTGCTTTCAGCTTCGATGTAGGAGGGCGTGGATATGTCTGCGGGTAAATAGCTGCGCCG  
ATGGTTTCTACAAAGATCGTTATGTTTATCGGCACTTTGCATCGGCCGCGCTCCCATTCCGGAAGTGCT  
TGACATTGGGGAGTTTAGCGAGAGCCTGACCTATTGCATCTCCCGCCGTGCACAGGGTGTACGTTGCAA  
GACCTGCCTGAAACCGAACTGCCCGCTGTTCTACAACCGTTCGCGGAGGCTATGGATGCGATCGCTGCGG  
CCGATCTTAGCCAGACGAGCGGGTTCGGCCCATTCGGACCGCAAGGAATCGGTCAATACACTACATGGCG  
TGATTTTCATATGCGCGATTGCTGATCCCCATGTGTATCACTGGCAAACCTGTGATGGACGACACCGTCAGT  
GCGTCCGTCGCGCAGGCTCTCGATGAGCTGATGCTTTGGGCCGAGGACTGCCCCGAAGTCCGGCACCTCG  
TGCACGCGGATTCGGCTCCAACAATGTCTGACGGACAATGGCCGCATAACAGCGGTCAATTGACTGGAG  
CGAGGCGATGTTCCGGGATTCCCAATACGAGGTCGCCAACATCTTCTTCTGGAGGCCGTGGTTGGCTTGT  
ATGGAGCAGCAGACGCGCTACTTCGAGCGGAGGCATCCGGAGCTTGCAGGATCGCCACGACTCCGGGCGT



ATATGCTCCGCATTGGTCTTGACCAACTCTATCAGAGCTTGGTTGACGGCAATTCGATGATGCAGCTTG  
GGCGCAGGGTCGATGCGACGCAATCGTCCGATCCGGAGCCGGGACTGTGCGGGCGTACACAAATCGCCCGC  
AGAAGCGCGGCCGTCTGGACCGATGGCTGTGTAGAAAGTACTCGCCGATAGTGGAACCGACGCCCCAGCA  
CTCGTCCGAGGGCAAAGAAATAGAGTAGATGCCGACCGGATCTGTTCGATCGACAAGCTCGAGtttctcca  
taataatgtgtgagtagttcccagataagggattagggttcctatagggtttcgctcatgtgttgagca  
tataagaaacccttagtatgtatttgtatttgtaaaaatacttctatcaataaaaatttctaattcctaaaa  
ccaaaatccagtaactaaaatccagatcCCCCGAATTAATTCGGCGTTAATTCAGTACATTA AAAACGTCC  
GCAATGTGTTATTAAGTTGTCTAAGCGTCAATT TGTTTACACCACAATATATCCTGCCA

brown/lowercase: kanamycin resistance gene

CYAN/UPPERCASE/UNDERLINED: C->A transversion to block vector's *BsaI* site

cyan/lowercase: T-DNA right border

GREEN/UPPERCASE: 2x35S CaMV promoter

ORANGE/UPPERCASE: attB1

BLUE/UPPERCASE: *AtTAS1c* 5' region

RED/UPPERCASE: *BsaI* site

magenta/lowercase: chloramphenicol resistance gene

MAGENTA/UPPERCASE: *ccdB* gene

red/lowercase: inverted *BsaI* site

blue/lowercase: *AtTAS1c* 3' region

orange/lowercase: *AtMIR173*

ORANGE/UPPERCASE/UNDERLINED: attB2

GREY/UPPERCASE/UNDERLINED: Nos terminator

green/lowercase: CaMV promoter

BROWN/UPPERCASE: hygromycin resistance gene

green/lowercase/underlined: CaMV terminator

CYAN/UPPERCASE: T-DNA left border
